# Supplementary material
Source: PubMed Central journal article supplement (PMC5902181)
Supplement: NIHMS956838-supplement-sup3.pdf [file NIHMS956838-supplement-sup3.pdf]

**Supplementary information S3. Sphingolipid metabolizing enzymes**

| Gene           | Protein<br>Alternative name;<br>catalytic activity<br>Topology                                                                                                                                      | Alteration linked to<br>disease                                                                                                                | Disease                                                                                                                                                      | Reference                |
|----------------|-----------------------------------------------------------------------------------------------------------------------------------------------------------------------------------------------------|------------------------------------------------------------------------------------------------------------------------------------------------|--------------------------------------------------------------------------------------------------------------------------------------------------------------|--------------------------|
| <i>SPTLC</i>   | Serine palmitoyltransferase (SPT)<br><br>Palmitoyl-CoA: L-serine C-palmitoyltransferase; condensation of serine and palmitoyl CoA to generate 3-ketodihydrosphingosine<br><br>Endoplasmic reticulum | Mutation of <i>SPT1</i> and <i>SPT2</i> subunits                                                                                               | Hereditary Sensory and Autonomic Neuropathy Type I (HSANI).                                                                                                  | (1-8)                    |
| <i>KDSR</i>    | 3-Ketodihydrosphingosine reductase (KDHR)<br><br>3-oxosphinganine: NADPH oxidoreductase; reduction of 3-ketodihydrosphingosine to dihydrosphingosine<br><br>Endoplasmic reticulum                   | --                                                                                                                                             | --                                                                                                                                                           | (9,10)                   |
| <i>LASS1-6</i> | (Dihydro)ceramide synthase (CerS1-6)<br><br>Acyl-CoA:(dihydro)sphingosine-N-acyltransferase; N-acylation of                                                                                         | Frameshift ( <i>fln</i> ) and point mutation ( <i>to</i> ) in <i>CerS1</i> gene encoding CerS1 protein (mouse brain)<br><i>CerS1</i> null mice | Progressive degeneration of cerebellar Purkinje neurons and widespread lipofuscin accumulation.<br><br>Altered cerebellum size due to significant atrophy of | (2,11-19)<br><br>(20,21) |

|                                                                                                                                                               |                                                                                       |                                                                                                                                                                                                                                                                                                                                                                                                                                                                                                                                                                                                                                                                                                                                            |         |
|---------------------------------------------------------------------------------------------------------------------------------------------------------------|---------------------------------------------------------------------------------------|--------------------------------------------------------------------------------------------------------------------------------------------------------------------------------------------------------------------------------------------------------------------------------------------------------------------------------------------------------------------------------------------------------------------------------------------------------------------------------------------------------------------------------------------------------------------------------------------------------------------------------------------------------------------------------------------------------------------------------------------|---------|
| <p>(dihydro)sphingosine and generation of dihydroceramide</p> <p>Endoplasmic reticulum, nuclear envelope, mitochondria, mitochondrial-associated membrane</p> |                                                                                       | cerebellar hemispheres between 6 and 12 months postnatally. Abnormal cerebellar foliation pattern during postnatal development.                                                                                                                                                                                                                                                                                                                                                                                                                                                                                                                                                                                                            |         |
|                                                                                                                                                               | <i>CerS2</i> null mice                                                                | Severe non-zonal hepatopathy from about 30 days of age, and increased rates of hepatocyte apoptosis and proliferation. Extensive and pronounced hepatocellular anisocytosis with extensive formation of nodules of regenerative hepatocellular hyperplasia in older mice. Progressive hepatomegaly and noninvasive hepatocellular carcinoma at approximately 10 months of age. Hepatic insulin resistance, defects in myelin in the central nervous system, and biophysical alterations in the properties of membrane lipids. Perivascular inflammation in the lungs from adult mice (3 months or older), accumulation of foamy alveolar macrophages in the airspaces and increase in airflow resistance. Development of pheochromocytoma. | (22-28) |
|                                                                                                                                                               | Missense encoding single-nucleotide in <i>CERS2</i> gene (variant rs267738) in humans | Associated to rhegmatogenous retinal detachment (RRD).                                                                                                                                                                                                                                                                                                                                                                                                                                                                                                                                                                                                                                                                                     | (29)    |
|                                                                                                                                                               | <i>CerS3</i> null mice                                                                | Dysfunction on epidermal barrier characteristics and structure.                                                                                                                                                                                                                                                                                                                                                                                                                                                                                                                                                                                                                                                                            | (18,30) |
|                                                                                                                                                               | Mutation resulting in a codon exchange Trp15Arg in human <i>CerS3</i>                 | Autosomal recessive congenital ichthyosis (ARCI).                                                                                                                                                                                                                                                                                                                                                                                                                                                                                                                                                                                                                                                                                          | (31)    |

|             |                                                                                                                                              |                                                                                                                                                               |                                                                                                                                                                                                                                                                         |         |
|-------------|----------------------------------------------------------------------------------------------------------------------------------------------|---------------------------------------------------------------------------------------------------------------------------------------------------------------|-------------------------------------------------------------------------------------------------------------------------------------------------------------------------------------------------------------------------------------------------------------------------|---------|
|             |                                                                                                                                              | <i>CerS4</i> null mice                                                                                                                                        | Altered epidermal stem/progenitor cell homeostasis and hair follicle cycling resulting in hair loss in older mice.                                                                                                                                                      | (32,33) |
|             |                                                                                                                                              | High <i>CerS5</i> expression in colorectal cancer (CRC) patients                                                                                              | Activation of autophagy which correlates with poor prognosis in patients with CRC.                                                                                                                                                                                      | (34)    |
|             |                                                                                                                                              | <i>CerS6</i> null mice                                                                                                                                        | Impaired neuromotoric function, such as claspings phenotype of hind limbs, poor performance in the horizontal wire test in null mice as compared to wild-type. Behavioral abnormality presenting higher levels of agitation and exploratory activity in the open field. | (35)    |
|             |                                                                                                                                              | Elevated mRNA levels of <i>LASS2</i> , <i>LASS4</i> , <i>LASS5</i> , <i>LASS6</i> and ceramides in malignant and benign tissue as compared with normal tissue | Breast cancer progression.                                                                                                                                                                                                                                              | (36)    |
|             |                                                                                                                                              | Overexpression of <i>CerS4</i> and <i>CerS6</i> in breast cancer cells (MCF-7) and colon cancer cells (HCT-116)                                               | Increased apoptosis and reduced colony formation.                                                                                                                                                                                                                       | (37)    |
| <i>DES1</i> | Dihydroceramide desaturase (DES)                                                                                                             | <i>Des1</i> null mice                                                                                                                                         | Skin and hair defects, tremors, hematological disorders, aberrant liver function, fail to gain weight and death 8–10 weeks after birth.                                                                                                                                 | (38-41) |
|             | Dihydroceramide $\Delta^4$ desaturation; introduction of (E) double bond between C4 and C-5 in the sphingosine backbone to generate ceramide | <i>Des1</i> <sup>-/-</sup> mouse embryonic fibroblasts (MEFs)                                                                                                 | Increased autophagy                                                                                                                                                                                                                                                     | (42)    |
|             | Endoplasmic Reticulum                                                                                                                        | Dihydroceramide desaturase inhibitors in T98G and U87MG glioblastoma cell lines                                                                               | Cytoprotective autophagy.                                                                                                                                                                                                                                               | (43)    |

|                     |                                                                                                                                                                                                        |                                                                                                                                                           |                                                                                                                                                                                                                                                                                 |         |
|---------------------|--------------------------------------------------------------------------------------------------------------------------------------------------------------------------------------------------------|-----------------------------------------------------------------------------------------------------------------------------------------------------------|---------------------------------------------------------------------------------------------------------------------------------------------------------------------------------------------------------------------------------------------------------------------------------|---------|
| <b>SGMS1-2</b>      | Sphingomyelin synthase (SMS1-2)                                                                                                                                                                        | <i>Sms1</i> gene null mice                                                                                                                                | Moderate neonatal lethality, reduced body weight, loss of fat tissues mass, $\beta$ cell mitochondrial dysfunction, and insulin secretion inhibition.                                                                                                                           | (44-47) |
|                     | Phosphatidylcholine: ceramide cholinephosphotransferase; transfer of phosphocholine from phosphatidylcholine (PC) to C-1 position of ceramide and generation of sphingomyelin and diacylglycerol (DAG) | <i>Sms1</i> <sup>-/-</sup> → <i>Ldlr</i> <sup>-/-</sup> macrophages                                                                                       | Decrease in atherosclerosis in <i>Ldlr</i> <sup>-/-</sup> mice fed a western diet for 3 months.                                                                                                                                                                                 | (48)    |
|                     |                                                                                                                                                                                                        | Adenovirus-mediated overexpression of SMS1 and SMS2 in mice                                                                                               | Increased lipoprotein atherogenic potential                                                                                                                                                                                                                                     | (49)    |
| <b>SMPD1, SMPD3</b> | Acid sphingomyelinase (aSMase)                                                                                                                                                                         | Acid sphingomyelinase deficiency (ASMD) caused by <i>SMPD1</i> mutations including missense, nonsense, frameshift mutations and splice variants in humans | Niemann-Pick Disease type A (NPD A) and Niemann-Pick Disease type B (NPD B).                                                                                                                                                                                                    | (50,51) |
|                     | Sphingomyelin phosphodiesterase; hydrolysis of sphingomyelin to ceramide                                                                                                                               |                                                                                                                                                           |                                                                                                                                                                                                                                                                                 |         |
|                     | Lysosome (L-SMase)<br>Extracellular; secreted (S-SMase)                                                                                                                                                | <i>Asm</i> knockout mice                                                                                                                                  | Niemann-Pick Disease type A (NPD A) and Niemann-Pick Disease type B (NPD B).<br>Defect in radiation-induced apoptosis.<br>Progressive degeneration of cerebellar Purkinje cells, neuronal degeneration.<br>Loss of lung metastasis in mice injected with B16F10 melanoma cells. | (52-59) |

|                                                                |                                                                                                                            |                                                                                                                                                                                                                                                                                                                                                                                                                                                                     |         |
|----------------------------------------------------------------|----------------------------------------------------------------------------------------------------------------------------|---------------------------------------------------------------------------------------------------------------------------------------------------------------------------------------------------------------------------------------------------------------------------------------------------------------------------------------------------------------------------------------------------------------------------------------------------------------------|---------|
|                                                                | <i>Asm</i> <sup>-/-</sup> ; <i>ApoE</i> <sup>-/-</sup> mice<br><i>Asm</i> <sup>-/-</sup> ; <i>Ldlr</i> <sup>-/-</sup> mice | Smaller foam cell lesions and decrease in lipoprotein retention within aortic root lesions in chow-fed <i>Asm</i> <sup>-/-</sup> ; <i>ApoE</i> <sup>-/-</sup> mice. Less sub-endothelial lipoprotein retention<br>Smaller aortic root lesions in Western diet-fed <i>Asm</i> <sup>-/-</sup> ; <i>Ldlr</i> <sup>-/-</sup> mice.<br>Reduction in lipoprotein retention within early lesions in both the chow-fed and Western diet-fed mice models of atherosclerosis. | (60-63) |
|                                                                | Lymphoblast cell lines from Niemann-Pick Disease patients.<br>ASM knockout (ASMKO) mice                                    | Defect in radiation-induced apoptosis.                                                                                                                                                                                                                                                                                                                                                                                                                              | (63)    |
| Neutral sphingomyelinase 2 (nSMase2)                           | Increased activity of nSMase induced by Aβ <sub>25-35</sub> peptide                                                        | Alzheimer's disease (AD).                                                                                                                                                                                                                                                                                                                                                                                                                                           | (64,65) |
| Outer leaflet of the plasma membrane, cytosol, golgi apparatus | <i>Smpd3</i> -null mouse                                                                                                   | Retarded maturation of chondrocytes and ossification in the epiphyseal growth plate, which leads to dwarfism and severe skeletal chondrodysplasia.                                                                                                                                                                                                                                                                                                                  | (66)    |
|                                                                | Recessive mutation fragilitas ossium (fro) in <i>Smpd3</i> gene in mice                                                    | Osteogenesis imperfecta.<br>Smaller mice at birth, deformities, multiple fractures of ribs and long bones. Elevated mortality. Parathyroid hormone is elevated and bone osteonectin is decreased by 30% in adult mice.<br>Lung anomalies.                                                                                                                                                                                                                           | (67-69) |
| Mitochondrial neutral sphingomyelinase (MA-nSMase)             | --                                                                                                                         | --                                                                                                                                                                                                                                                                                                                                                                                                                                                                  | (70,71) |
| Mitochondria                                                   |                                                                                                                            |                                                                                                                                                                                                                                                                                                                                                                                                                                                                     |         |

|                |                                                                                                                                                                                                                                                    |                                                                                                                                              |                                                                                                                                                                                                                                                                                                                                                                                                   |         |
|----------------|----------------------------------------------------------------------------------------------------------------------------------------------------------------------------------------------------------------------------------------------------|----------------------------------------------------------------------------------------------------------------------------------------------|---------------------------------------------------------------------------------------------------------------------------------------------------------------------------------------------------------------------------------------------------------------------------------------------------------------------------------------------------------------------------------------------------|---------|
| <b>CGT</b>     | <p>Ceramide galactosyltransferase (CGT)</p> <p>UDP-Glucose: N-Acylsphingosine D-Glucosyltransferase; transfer of galactose to ceramide to generate galactosylceramide</p> <p>Endoplasmic reticulum</p>                                             | <i>Cgt</i> null mutant mice                                                                                                                  | <p>Disruption of lipid bilayer of the myelin membrane of the central nervous system (CNS) and the peripheral nervous system (PNS).</p> <p>Growth retardation. Whole body tremor, increased loss of locomotor activity and evident gait pattern. Minute activity showed in the open field test. Increasing weakness of their front and hind legs, resulting in severe paralysis around day 21.</p> | (72-77) |
| <b>UGCG</b>    | <p>Glucosylceramide synthase (GCS)</p>                                                                                                                                                                                                             | <i>Ugcg</i> null mice                                                                                                                        | Embryonic lethality occurring at gastrulation due to massive apoptosis.                                                                                                                                                                                                                                                                                                                           | (78-81) |
|                | <p>UDP-Glucose: N-Acylsphingosine D-Glucosyltransferase; glycosylation of ceramide to generate glucosylceramide</p>                                                                                                                                | GCS overexpression in several cancer and leukemia cell lines                                                                                 | Multidrug-resistance (MDR). Lymph node invasion, reduced mean overall 5-year survival and reduced mean disease-free survival times in bladder cancer.                                                                                                                                                                                                                                             | (81-83) |
|                | <p>Cis/medial-Golgi apparatus</p>                                                                                                                                                                                                                  | <i>Ugcg</i> <sup>ΔEX7Neo/ΔEX7Hydro (-/-)</sup> mutant teratoma                                                                               | Poorly differentiated epithelial tissue and small focus of bronchial epithelium.                                                                                                                                                                                                                                                                                                                  | (80)    |
|                |                                                                                                                                                                                                                                                    | Regular chow-fed or western diet-fed <i>ApoE</i> <sup>-/-</sup> mice plus D-threo-1-phenyl-2-decanoylamino-3-morpholino-1-propanol (D-PDMP). | Ameliorated aortic wall thickening, arterial stiffness and pulse wave velocity in atherosclerotic mice.                                                                                                                                                                                                                                                                                           | (84-86) |
| <b>B4GALT6</b> | <p>Lactosylceramide synthase (LCS)</p> <p>UDP-Galactose: Beta-N-Acetylglucosamine Beta-1,4-Galactosyltransferase; transfer of galactose from UDP-galactose to glucosylceramide and generation of lactosylceramide</p> <p>Trans-Golgi apparatus</p> | Wester-fed rabbit plus D-PDMP.                                                                                                               | Ameliorated hyperlipidemia and atherosclerotic plaque buildup and lumen volume in western diet-fed <i>ApoE</i> <sup>-/-</sup> mice. Prevention of cardiac hypertrophy in <i>ApoE</i> <sup>-/-</sup> mice fed a high fat and high cholesterol (HFHC) diet.                                                                                                                                         | (87,88) |

|              |                                                                                                                                                                                            |                                                                                                                                                              |                                                                                                                                                                                                                           |              |
|--------------|--------------------------------------------------------------------------------------------------------------------------------------------------------------------------------------------|--------------------------------------------------------------------------------------------------------------------------------------------------------------|---------------------------------------------------------------------------------------------------------------------------------------------------------------------------------------------------------------------------|--------------|
| <b>GBA1</b>  | Acid $\beta$ -glucosylceramidase (GBA1)                                                                                                                                                    | Pathogenic mutations in GBA gene which includes point mutations, insertions, deletions, frameshift changes, splice site alterations, and recombinant alleles | Gaucher disease (GD), parkinsonian symptoms, development of Lewy body disorders. Increased occurrence of B-cell or plasma cell malignancy as multiple myeloma (MM), acute or chronic leukemia, Hodgkin's disease, cancer. | (81,89-95)   |
|              | D-Glucosyl-N-Acylsphingosine Glucohydrolase; hydrolysis of glucocerebroside into glucose and ceramide                                                                                      | GBA mutation carriers                                                                                                                                        | Increased susceptibility to alpha-synucleinopathies: Parkinson's disease (PD), dementia with Lewy bodies, and multiple system atrophy.                                                                                    | (95-97)      |
| <b>CERKL</b> | Ceramide kinase (CERK)<br><br>ATP: ceramide 1-phosphotransferase; phosphorylation of ceramide to form ceramide 1-phosphate<br><br>Trans-Golgi apparatus, cytosol, nucleus, plasma membrane | Loss-of-function mutation in <i>CERKL</i> in humans                                                                                                          | Retinitis Pigmentosa (RP).                                                                                                                                                                                                | (98-103)     |
|              |                                                                                                                                                                                            | <i>CerK</i> -null C57BL/6J mice                                                                                                                              | Abnormal neuronal functions involving emotional behavior.                                                                                                                                                                 | (104)        |
|              |                                                                                                                                                                                            | <i>CerK</i> -null BALB/c mice                                                                                                                                | Reduced circulating neutrophils and impaired defense against pneumonia.                                                                                                                                                   | (105)        |
|              |                                                                                                                                                                                            | <i>CerK</i> <sup>-/-</sup> mice                                                                                                                              | Decreased MCP-1/CCR2 signaling in macrophages infiltrating adipose tissue, resulting in the prevention of obesity and diabetes.                                                                                           | (106)        |
| <b>ASAH1</b> | Acid ceramidase (ACDase)<br><br>N-Acylsphingosine amidohydrolase; hydrolysis of ceramide into the sphingosine backbone and a fatty acid<br><br>Lysosomes                                   | Mutations of acid ceramidase in humans                                                                                                                       | Farber's disease.                                                                                                                                                                                                         | (52,107-110) |
|              |                                                                                                                                                                                            | Increased expression of AC in tumor cells.<br>Overexpression of AC induced by radiation.                                                                     | Cell proliferation and cancer resistance.                                                                                                                                                                                 | (111-115)    |
|              |                                                                                                                                                                                            | <i>Asah1</i> <sup>-/-</sup> null mice<br><i>Asah1</i> <sup>+/-</sup> mice                                                                                    | Embryonic lethality in homozygotes and progressive lipid storage disease in heterozygotes                                                                                                                                 | (116)        |

|                                                               |                                    |                                                                                                                                     |                                                                                                                                                                                                                                          |                                                                                                                                    |
|---------------------------------------------------------------|------------------------------------|-------------------------------------------------------------------------------------------------------------------------------------|------------------------------------------------------------------------------------------------------------------------------------------------------------------------------------------------------------------------------------------|------------------------------------------------------------------------------------------------------------------------------------|
| <p><b>ASAH2, 2B, 2C</b></p>                                   | <p>Neutral ceramidase (NCDase)</p> | <p><i>nCDase</i><sup>-/-</sup> null mice</p>                                                                                        | <p>Improved brain function recovery and lessened brain contusion volume after traumatic brain injury (TBI). Increased inflammation in dextran sulfate sodium (DSS)-induced colitis model.</p>                                            | <p>(117-119)</p>                                                                                                                   |
|                                                               | <p>Plasma membrane</p>             | <p><i>nCDase</i> inhibition in colon cancer cells and a colon cancer xenograft mouse model<br/><i>nCDase</i><sup>-/-</sup> mice</p> | <p>Decreased survival, increased apoptosis, and autophagy of colon cancer. Delayed tumor growth and decreased tumor cell proliferation in xenograft model. <i>nCDase</i><sup>-/-</sup> mice showed protection from tumor protection.</p> | <p>(120)</p>                                                                                                                       |
|                                                               |                                    | <p><i>nCDase</i><sup>-/-</sup> MEF cells</p>                                                                                        | <p>Protection from nutrient deprivation-induced necroptosis.</p>                                                                                                                                                                         | <p>(121)</p>                                                                                                                       |
|                                                               |                                    | <p><i>Asah2</i> mutant mice</p>                                                                                                     | <p>Defective digestion of dietary sphingolipids.</p>                                                                                                                                                                                     | <p>(122)</p>                                                                                                                       |
|                                                               |                                    | <p>Overexpression of neutral CDase in primary hepatocytes.</p>                                                                      | <p>Inhibition of TNF-<math>\alpha</math>-induced apoptosis.</p>                                                                                                                                                                          | <p>(123)</p>                                                                                                                       |
|                                                               | <p><b>ACER1-3</b></p>              | <p>Alkaline ceramidase (alkCDase)</p>                                                                                               | <p><i>Acer1</i><sup>-/-</sup> mice<br/><i>Acer1</i><sup>-/-</sup> skin</p>                                                                                                                                                               | <p>Alterations in infundibulum and sebaceous gland architecture. Disrupted skin homeostasis and whole-body energy homeostasis.</p> |
| <p>Endoplasmic reticulum (ACER1), Golgi apparatus (ACER2)</p> |                                    | <p><i>Acer3</i><sup>-/-</sup> mice</p>                                                                                              | <p>Aggravated dextran sulfate sodium (DSS)-induced colitis and colitis-associated colorectal cancer (CAC). Purkinje cell degeneration and cerebellar ataxia.</p>                                                                         | <p>(127)</p>                                                                                                                       |
|                                                               |                                    | <p>Inhibition of ACER3 expression by shRNA-encoding lentivirus system in human acute myeloid leukemia (AML) cells</p>               | <p>Decreased cell growth and colony formation, and elevated apoptosis.</p>                                                                                                                                                               | <p>(128,129)</p>                                                                                                                   |
|                                                               |                                    | <p>Point mutation E33G in the human ACER3 gene resulting in enzyme inactivation</p>                                                 | <p>Childhood leukodystrophy.</p>                                                                                                                                                                                                         | <p>(130)</p>                                                                                                                       |



|          |                                                                                                     |                                                                                                            |                                                                                                                                                   |           |
|----------|-----------------------------------------------------------------------------------------------------|------------------------------------------------------------------------------------------------------------|---------------------------------------------------------------------------------------------------------------------------------------------------|-----------|
| SPHK1, 2 | Sphingosine kinases (SK1, SK2)                                                                      | Overexpression of mRNA transcript and/or SK1 protein                                                       | Associated to acute myeloid leukemia (AML) and increased tumor progression, chemo-resistance and poor prognosis.                                  | (131)     |
|          | ATP: sphingoid base 1-phosphotransferase; phosphorylation of sphingosine to sphingosine-1-phosphate | Knockdown of SK1 protein or inhibition of SK1 activity. Dominant-negative SK1 mutant in cells              | Decreased cytokine-induced pro-inflammatory proteins.                                                                                             | (132-140) |
|          | Cytosol, plasma membrane (SK1)                                                                      | <i>Sphk1</i> <sup>-/-</sup> knockout mice in AOM/DSS-induced colon carcinogenesis                          | Decreased aberrant crypt foci (ACF) formation and significantly reduced colon cancer development.                                                 | (141-144) |
|          |                                                                                                     | p53-SK1 double knockout mice                                                                               | Increased survival and decreased tumor burden.                                                                                                    | (145)     |
|          |                                                                                                     | Murine pancreatic cancer cells are implanted in the abdominal cavities of <i>Sphk1</i> <sup>-/-</sup> mice | Reduced tumor burden of pancreatic cancer peritoneal carcinomatosis (PC).                                                                         | (146-148) |
|          |                                                                                                     | <i>Sphk1</i> <sup>-/-</sup> knockout mice or inhibition of SK1 activity                                    | Protection from dextran sulfate sodium (DSS)-induced colitis.                                                                                     | (149)     |
|          |                                                                                                     | Mice with Lyve-1 CRE-mediated ablation of <i>Sphk1</i> and lacking <i>Sphk2</i>                            | Loss of S1P in lymph while maintaining normal plasma S1P and subsequently block of T and B cell egress from lymph nodes.                          | (150)     |
|          |                                                                                                     | Knockdown of SK1 or SK2 in arthritis mouse model                                                           | Decreased incidence and severity of arthritis in SK1 <sup>-/-</sup> mice but increased disease severity and incidence in SK2 <sup>-/-</sup> mice. | (151)     |
|          | Sphingosine kinases (SK1, SK2)                                                                      |                                                                                                            |                                                                                                                                                   | (152-155) |
|          | Nucleus, endoplasmic reticulum, and mitochondria (SK2)                                              | <i>Sphk2</i> <sup>-/-</sup> mice in a colitis and colitis-associated cancer model                          | Increased expression of <i>SphK1</i> and <i>S1PR1</i> resulting in exacerbated acute colitis and colitis-associated cancer (CAC).                 | (152,156) |

|                |                                                                                                                                                               |                                                                                                                             |                                                                                                                                                                                                                                                                                                                                                                                                                               |           |
|----------------|---------------------------------------------------------------------------------------------------------------------------------------------------------------|-----------------------------------------------------------------------------------------------------------------------------|-------------------------------------------------------------------------------------------------------------------------------------------------------------------------------------------------------------------------------------------------------------------------------------------------------------------------------------------------------------------------------------------------------------------------------|-----------|
|                |                                                                                                                                                               | Knockdown SK2 expression in multiple myeloma (MM) cells.<br>Inhibition of SK2 activity in MM cells                          | Decreased cell growth, increased cell death.                                                                                                                                                                                                                                                                                                                                                                                  | (157)     |
|                |                                                                                                                                                               | Inhibition of SK2 in a lupus nephritis mouse model (MRL/lpr mice)                                                           | Reduced progression of glomerular disease.                                                                                                                                                                                                                                                                                                                                                                                    | (158-164) |
| <i>SGPP1,2</i> | Sphingosine-1-phosphate phosphatases (SPP1, SPP2)                                                                                                             | siRNA knockdown of hSPPase1 in MCF-7 cells                                                                                  | Increased resistance to cytotoxic agents.                                                                                                                                                                                                                                                                                                                                                                                     | (165)     |
|                | (Dihydro)sphingosine-1-phosphate phosphohydrolase: dephosphorylation of sphingosine-1-phosphate back to sphingosine<br><br>Endoplasmic reticulum              | Both <i>in vivo</i> and <i>in vitro</i> overexpression of mRNA transcript and/or SPP2 protein in human gastric cancer cells | Associated to cell proliferation and cell migration.                                                                                                                                                                                                                                                                                                                                                                          | (166)     |
| <i>SGPL1</i>   | Sphingosine-1-phosphate lyase (SPL)                                                                                                                           | <i>Sgpl1</i> <sup>-/-</sup> knockout mice                                                                                   | Mice do not survive beyond 3–4 weeks after birth and show significant growth failure and anemia, vascular abnormalities, skeletal defects, thoracic malformations of sternum, ribs and vertebrae, and renal abnormalities. Metabolic and immunological alterations.<br>Increased pro-inflammatory response with impaired migration of neutrophils into tissues and therefore abnormal neutrophil homeostatic regulatory loop. | (158-164) |
|                | Sphinganine-1-phosphate palmitaldehyde-lyase: breaks down sphingosine-1-phosphate to produce phosphoethanolamine and hexadecenal<br><br>Endoplasmic reticulum | Intestinal epithelium-specific <i>Sgpl1</i> <sup>-/-</sup> knockout mice                                                    | Increased chemically (AOM/DSS treatment or DSS treatment) induced colitis and tumor formation.                                                                                                                                                                                                                                                                                                                                | (165)     |

|  |                                                                                                                              |                                                                                                                                   |       |
|--|------------------------------------------------------------------------------------------------------------------------------|-----------------------------------------------------------------------------------------------------------------------------------|-------|
|  | SPL loss-of-function mutant mice                                                                                             | Increased hemodynamic recovery from ex vivo Ischemia/Reperfusion-induced heart injury.                                            | (166) |
|  | Downregulation of SPL expression or chemical inhibition of SPL activity in human pulmonary artery endothelial cells (HPAECs) | Increased cell migration and wound healing.                                                                                       | (167) |
|  | Stable overexpression/knockdown of human SPL in human embryonic kidney (HEK293T)                                             | Elevated apoptosis as compared to control cells in response to IR, whereas knockdown of SPL conferred resistance to IR treatment. | (168) |

- Merrill, A. H., Jr. (1983) Characterization of serine palmitoyltransferase activity in Chinese hamster ovary cells. *Biochim Biophys Acta* **754**, 284-291
- Mandon, E. C., Ehses, I., Rother, J., van Echten, G., and Sandhoff, K. (1992) Subcellular localization and membrane topology of serine palmitoyltransferase, 3-dehydrosphinganine reductase, and sphinganine N-acyltransferase in mouse liver. *The Journal of biological chemistry* **267**, 11144-11148
- Yasuda, S., Nishijima, M., and Hanada, K. (2003) Localization, topology, and function of the LCB1 subunit of serine palmitoyltransferase in mammalian cells. *The Journal of biological chemistry* **278**, 4176-4183
- Dawkins, J. L., Hulme, D. J., Brahmabhatt, S. B., Auer-Grumbach, M., and Nicholson, G. A. (2001) Mutations in SPTLC1, encoding serine palmitoyltransferase, long chain base subunit-1, cause hereditary sensory neuropathy type I. *Nature genetics* **27**, 309-312
- Bejaoui, K., Uchida, Y., Yasuda, S., Ho, M., Nishijima, M., Brown, R. H., Jr., Holleran, W. M., and Hanada, K. (2002) Hereditary sensory neuropathy type 1 mutations confer dominant negative effects on serine palmitoyltransferase, critical for sphingolipid synthesis. *The Journal of clinical investigation* **110**, 1301-1308
- Bejaoui, K., Wu, C., Scheffler, M. D., Haan, G., Ashby, P., Wu, L., de Jong, P., and Brown, R. H., Jr. (2001) SPTLC1 is mutated in hereditary sensory neuropathy, type 1. *Nature genetics* **27**, 261-262
- Penno, A., Reilly, M. M., Houlden, H., Laura, M., Rentsch, K., Niederkofler, V., Stoeckli, E. T., Nicholson, G., Eichler, F., Brown, R. H., Jr., von Eckardstein, A., and Hornemann, T. (2010) Hereditary sensory neuropathy type 1 is caused by the accumulation of two neurotoxic sphingolipids. *The Journal of biological chemistry* **285**, 11178-11187
- Murphy, S. M., Ernst, D., Wei, Y., Laura, M., Liu, Y. T., Polke, J., Blake, J., Winer, J., Houlden, H., Hornemann, T., and Reilly, M. M. (2013) Hereditary sensory and autonomic neuropathy type 1 (HSANI) caused by a novel mutation in SPTLC2. *Neurology* **80**, 2106-2111

9. Kihara, A., and Igarashi, Y. (2004) FVT-1 is a mammalian 3-ketodihydrosphingosine reductase with an active site that faces the cytosolic side of the endoplasmic reticulum membrane. *The Journal of biological chemistry* **279**, 49243-49250
10. Beeler, T., Bacikova, D., Gable, K., Hopkins, L., Johnson, C., Slife, H., and Dunn, T. (1998) The *Saccharomyces cerevisiae* TSC10/YBR265w gene encoding 3-ketosphinganine reductase is identified in a screen for temperature-sensitive suppressors of the Ca<sup>2+</sup>-sensitive csg2Delta mutant. *The Journal of biological chemistry* **273**, 30688-30694
11. Venkataraman, K., Riebeling, C., Bodennec, J., Riezman, H., Allegood, J. C., Sullards, M. C., Merrill, A. H., Jr., and Futerman, A. H. (2002) Upstream of growth and differentiation factor 1 (uog1), a mammalian homolog of the yeast longevity assurance gene 1 (LAG1), regulates N-stearoyl-sphinganine (C18-(dihydro)ceramide) synthesis in a fumonisin B1-independent manner in mammalian cells. *The Journal of biological chemistry* **277**, 35642-35649
12. Riebeling, C., Allegood, J. C., Wang, E., Merrill, A. H., Jr., and Futerman, A. H. (2003) Two mammalian longevity assurance gene (LAG1) family members, trh1 and trh4, regulate dihydroceramide synthesis using different fatty acyl-CoA donors. *The Journal of biological chemistry* **278**, 43452-43459
13. Lahiri, S., and Futerman, A. H. (2005) LASS5 is a bona fide dihydroceramide synthase that selectively utilizes palmitoyl-CoA as acyl donor. *The Journal of biological chemistry* **280**, 33735-33738
14. Mizutani, Y., Kihara, A., and Igarashi, Y. (2005) Mammalian Lass6 and its related family members regulate synthesis of specific ceramides. *The Biochemical journal* **390**, 263-271
15. Laviad, E. L., Albee, L., Pankova-Kholmyansky, I., Epstein, S., Park, H., Merrill, A. H., Jr., and Futerman, A. H. (2008) Characterization of ceramide synthase 2: tissue distribution, substrate specificity, and inhibition by sphingosine 1-phosphate. *The Journal of biological chemistry* **283**, 5677-5684
16. Mullen, T. D., Hannun, Y. A., and Obeid, L. M. (2012) Ceramide synthases at the centre of sphingolipid metabolism and biology. *The Biochemical journal* **441**, 789-802
17. Weinmann, A., Galle, P. R., and Teufel, A. (2005) LASS6, an additional member of the longevity assurance gene family. *Int J Mol Med* **16**, 905-910
18. Jennemann, R., Rabionet, M., Gorgas, K., Epstein, S., Dalpke, A., Rothermel, U., Bayerle, A., van der Hoeven, F., Imgrund, S., Kirsch, J., Nickel, W., Willecke, K., Riezman, H., Grone, H. J., and Sandhoff, R. (2012) Loss of ceramide synthase 3 causes lethal skin barrier disruption. *Hum Mol Genet* **21**, 586-608
19. Levy, M., and Futerman, A. H. (2010) Mammalian ceramide synthases. *IUBMB Life* **62**, 347-356
20. Piccinini, M., Scandroglio, F., Prioni, S., Buccinna, B., Loberto, N., Aureli, M., Chigorno, V., Lupino, E., DeMarco, G., Lomartire, A., Rinaudo, M. T., Sonnino, S., and Prinetti, A. (2010) Deregulated sphingolipid metabolism and membrane organization in neurodegenerative disorders. *Mol Neurobiol* **41**, 314-340

21. Ginkel, C., Hartmann, D., vom Dorp, K., Zlomuzica, A., Farwanah, H., Eckhardt, M., Sandhoff, R., Degen, J., Rabionet, M., Dere, E., Dormann, P., Sandhoff, K., and Willecke, K. (2012) Ablation of neuronal ceramide synthase 1 in mice decreases ganglioside levels and expression of myelin-associated glycoprotein in oligodendrocytes. *The Journal of biological chemistry* **287**, 41888-41902
22. Pewzner-Jung, Y., Brenner, O., Braun, S., Laviad, E. L., Ben-Dor, S., Feldmesser, E., Horn-Saban, S., Amann-Zalcenstein, D., Raanan, C., Berkutzki, T., Erez-Roman, R., Ben-David, O., Levy, M., Holzman, D., Park, H., Nyska, A., Merrill, A. H., Jr., and Futerman, A. H. (2010) A critical role for ceramide synthase 2 in liver homeostasis: II. insights into molecular changes leading to hepatopathy. *The Journal of biological chemistry* **285**, 10911-10923
23. Pewzner-Jung, Y., Park, H., Laviad, E. L., Silva, L. C., Lahiri, S., Stiban, J., Erez-Roman, R., Brugger, B., Sachsenheimer, T., Wieland, F., Prieto, M., Merrill, A. H., Jr., and Futerman, A. H. (2010) A critical role for ceramide synthase 2 in liver homeostasis: I. alterations in lipid metabolic pathways. *The Journal of biological chemistry* **285**, 10902-10910
24. Zigdon, H., Kogot-Levin, A., Park, J. W., Goldschmidt, R., Kelly, S., Merrill, A. H., Jr., Scherz, A., Pewzner-Jung, Y., Saada, A., and Futerman, A. H. (2013) Ablation of ceramide synthase 2 causes chronic oxidative stress due to disruption of the mitochondrial respiratory chain. *The Journal of biological chemistry* **288**, 4947-4956
25. Park, J. W., Park, W. J., Kuperman, Y., Boura-Halfon, S., Pewzner-Jung, Y., and Futerman, A. H. (2013) Ablation of very long acyl chain sphingolipids causes hepatic insulin resistance in mice due to altered detergent-resistant membranes. *Hepatology* **57**, 525-532
26. Silva, L. C., Ben David, O., Pewzner-Jung, Y., Laviad, E. L., Stiban, J., Bandyopadhyay, S., Merrill, A. H., Jr., Prieto, M., and Futerman, A. H. (2012) Ablation of ceramide synthase 2 strongly affects biophysical properties of membranes. *Journal of lipid research* **53**, 430-436
27. Petrache, I., Kamocki, K., Poirier, C., Pewzner-Jung, Y., Laviad, E. L., Schweitzer, K. S., Van Demark, M., Justice, M. J., Hubbard, W. C., and Futerman, A. H. (2013) Ceramide synthases expression and role of ceramide synthase-2 in the lung: insight from human lung cells and mouse models. *PLoS one* **8**, e62968
28. Park, W. J., Brenner, O., Kogot-Levin, A., Saada, A., Merrill, A. H., Jr., Pewzner-Jung, Y., and Futerman, A. H. (2015) Development of pheochromocytoma in ceramide synthase 2 null mice. *Endocr Relat Cancer* **22**, 623-632
29. Kirin, M., Chandra, A., Charteris, D. G., Hayward, C., Campbell, S., Celap, I., Bencic, G., Vatavuk, Z., Kirac, I., Richards, A. J., Tenesa, A., Snead, M. P., Fleck, B. W., Singh, J., Harsum, S., Maclaren, R. E., den Hollander, A. I., Dunlop, M. G., Hoyng, C. B., Wright, A. F., Campbell, H., Vitart, V., and Mitry, D. (2013) Genome-wide association study identifies genetic risk underlying primary rhegmatogenous retinal detachment. *Hum Mol Genet* **22**, 3174-3185
30. Jennemann, R., Sandhoff, R., Langbein, L., Kaden, S., Rothermel, U., Gallala, H., Sandhoff, K., Wiegandt, H., and Grone, H. J. (2007) Integrity and barrier function of the epidermis critically depend on glucosylceramide synthesis. *The Journal of biological chemistry* **282**, 3083-3094
31. Eckl, K. M., Tidhar, R., Thiele, H., Oji, V., Hausser, I., Brodesser, S., Preil, M. L., Onal-Akan, A., Stock, F., Muller, D., Becker, K., Casper, R., Nurnberg, G., Altmuller, J., Nurnberg, P., Traupe, H., Futerman, A. H., and Hennies, H. C. (2013) Impaired epidermal ceramide synthesis

causes autosomal recessive congenital ichthyosis and reveals the importance of ceramide acyl chain length. *The Journal of investigative dermatology* **133**, 2202-2211

32. Ebel, P., Imgrund, S., Vom Dorp, K., Hofmann, K., Maier, H., Drake, H., Degen, J., Dormann, P., Eckhardt, M., Franz, T., and Willecke, K. (2014) Ceramide synthase 4 deficiency in mice causes lipid alterations in sebum and results in alopecia. *The Biochemical journal* **461**, 147-158
33. Peters, F., Vorhagen, S., Brodesser, S., Jakobshagen, K., Bruning, J. C., Niessen, C. M., and Kronke, M. (2015) Ceramide synthase 4 regulates stem cell homeostasis and hair follicle cycling. *The Journal of investigative dermatology* **135**, 1501-1509
34. Fitzgerald, S., Sheehan, K. M., Espina, V., O'Grady, A., Cummins, R., Kenny, D., Liotta, L., O'Kennedy, R., Kay, E. W., and Kijanka, G. S. (2015) High CerS5 expression levels associate with reduced patient survival and transition from apoptotic to autophagy signalling pathways in colorectal cancer. *J Pathol Clin Res* **1**, 54-65
35. Ebel, P., Vom Dorp, K., Petrasch-Parwez, E., Zlomuzica, A., Kinugawa, K., Mariani, J., Minich, D., Ginkel, C., Welcker, J., Degen, J., Eckhardt, M., Dere, E., Dormann, P., and Willecke, K. (2013) Inactivation of ceramide synthase 6 in mice results in an altered sphingolipid metabolism and behavioral abnormalities. *The Journal of biological chemistry* **288**, 21433-21447
36. Schiffmann, S., Sandner, J., Birod, K., Wobst, I., Angioni, C., Ruckhaberle, E., Kaufmann, M., Ackermann, H., Lotsch, J., Schmidt, H., Geisslinger, G., and Grosch, S. (2009) Ceramide synthases and ceramide levels are increased in breast cancer tissue. *Carcinogenesis* **30**, 745-752
37. Hartmann, D., Lucks, J., Fuchs, S., Schiffmann, S., Schreiber, Y., Ferreiros, N., Merkens, J., Marschalek, R., Geisslinger, G., and Grosch, S. (2012) Long chain ceramides and very long chain ceramides have opposite effects on human breast and colon cancer cell growth. *The international journal of biochemistry & cell biology* **44**, 620-628
38. Kraveka, J. M., Li, L., Szulc, Z. M., Bielawski, J., Ogretmen, B., Hannun, Y. A., Obeid, L. M., and Bielawska, A. (2007) Involvement of dihydroceramide desaturase in cell cycle progression in human neuroblastoma cells. *The Journal of biological chemistry* **282**, 16718-16728
39. Beauchamp, E., Goenaga, D., Le Bloc'h, J., Catheline, D., Legrand, P., and Rioux, V. (2007) Myristic acid increases the activity of dihydroceramide Delta4-desaturase 1 through its N-terminal myristoylation. *Biochimie* **89**, 1553-1561
40. Holland, W. L., Brozinick, J. T., Wang, L. P., Hawkins, E. D., Sargent, K. M., Liu, Y., Narra, K., Hoehn, K. L., Knotts, T. A., Siesky, A., Nelson, D. H., Karathanasis, S. K., Fontenot, G. K., Birnbaum, M. J., and Summers, S. A. (2007) Inhibition of ceramide synthesis ameliorates glucocorticoid-, saturated-fat-, and obesity-induced insulin resistance. *Cell Metab* **5**, 167-179
41. Savile, C. K., Fabrias, G., and Buist, P. H. (2001) Dihydroceramide delta(4) desaturase initiates substrate oxidation at C-4. *J Am Chem Soc* **123**, 4382-4385
42. Siddique, M. M., Li, Y., Wang, L., Ching, J., Mal, M., Ilkayeva, O., Wu, Y. J., Bay, B. H., and Summers, S. A. (2013) Ablation of dihydroceramide desaturase 1, a therapeutic target for the treatment of metabolic diseases, simultaneously stimulates anabolic and catabolic signaling. *Mol Cell Biol* **33**, 2353-2369

43. Casasampere, M., Ordonez, Y. F., Casas, J., and Fabrias, G. (2017) Dihydroceramide desaturase inhibitors induce autophagy via dihydroceramide-dependent and independent mechanisms. *Biochim Biophys Acta* **1861**, 264-275
44. Jeckel, D., Karrenbauer, A., Birk, R., Schmidt, R. R., and Wieland, F. (1990) Sphingomyelin is synthesized in the cis Golgi. *FEBS letters* **261**, 155-157
45. Huitema, K., van den Dikkenberg, J., Brouwers, J. F., and Holthuis, J. C. (2004) Identification of a family of animal sphingomyelin synthases. *The EMBO journal* **23**, 33-44
46. Holthuis, J. C., and Luberto, C. (2010) Tales and mysteries of the enigmatic sphingomyelin synthase family. *Advances in experimental medicine and biology* **688**, 72-85
47. Yano, M., Watanabe, K., Yamamoto, T., Ikeda, K., Senokuchi, T., Lu, M., Kadomatsu, T., Tsukano, H., Ikawa, M., Okabe, M., Yamaoka, S., Okazaki, T., Umehara, H., Gotoh, T., Song, W. J., Node, K., Taguchi, R., Yamagata, K., and Oike, Y. (2011) Mitochondrial dysfunction and increased reactive oxygen species impair insulin secretion in sphingomyelin synthase 1-null mice. *The Journal of biological chemistry* **286**, 3992-4002
48. Li, Z., Fan, Y., Liu, J., Li, Y., Huan, C., Bui, H. H., Kuo, M. S., Park, T. S., Cao, G., and Jiang, X. C. (2012) Impact of sphingomyelin synthase 1 deficiency on sphingolipid metabolism and atherosclerosis in mice. *Arterioscler Thromb Vasc Biol* **32**, 1577-1584
49. Dong, J., Liu, J., Lou, B., Li, Z., Ye, X., Wu, M., and Jiang, X. C. (2006) Adenovirus-mediated overexpression of sphingomyelin synthases 1 and 2 increases the atherogenic potential in mice. *Journal of lipid research* **47**, 1307-1314
50. Schuchman, E. H. (2007) The pathogenesis and treatment of acid sphingomyelinase-deficient Niemann-Pick disease. *J Inherit Metab Dis* **30**, 654-663
51. McGovern, M. M., Avetisyan, R., Sanson, B. J., and Lidove, O. (2017) Disease manifestations and burden of illness in patients with acid sphingomyelinase deficiency (ASMD). *Orphanet J Rare Dis* **12**, 41
52. Gatt, S. (1963) Enzymic Hydrolysis and Synthesis of Ceramides. *The Journal of biological chemistry* **238**, 3131-3133
53. Quintern, L. E., Schuchman, E. H., Levran, O., Suchi, M., Ferlinz, K., Reinke, H., Sandhoff, K., and Desnick, R. J. (1989) Isolation of cDNA clones encoding human acid sphingomyelinase: occurrence of alternatively processed transcripts. *The EMBO journal* **8**, 2469-2473
54. Jenkins, R. W., Canals, D., and Hannun, Y. A. (2009) Roles and regulation of secretory and lysosomal acid sphingomyelinase. *Cellular signalling* **21**, 836-846
55. Brady, R. O., Kanfer, J. N., Mock, M. B., and Fredrickson, D. S. (1966) The metabolism of sphingomyelin. II. Evidence of an enzymatic deficiency in Niemann-Pick disease. *Proceedings of the National Academy of Sciences of the United States of America* **55**, 366-369
56. Horinouchi, K., Erlich, S., Perl, D. P., Ferlinz, K., Bisgaier, C. L., Sandhoff, K., Desnick, R. J., Stewart, C. L., and Schuchman, E. H. (1995) Acid sphingomyelinase deficient mice: a model of types A and B Niemann-Pick disease. *Nature genetics* **10**, 288-293
57. Kuemmel, T. A., Schroeder, R., and Stoffel, W. (1997) Light and electron microscopic analysis of the central and peripheral nervous systems of acid sphingomyelinase-deficient mice resulting from gene targeting. *J Neuropathol Exp Neurol* **56**, 171-179

58. Wu, B. X., Fan, J., Boyer, N. P., Jenkins, R. W., Koutalos, Y., Hannun, Y. A., and Crosson, C. E. (2015) Lack of Acid Sphingomyelinase Induces Age-Related Retinal Degeneration. *PLoS one* **10**, e0133032
59. Carpinteiro, A., Becker, K. A., Japtok, L., Hessler, G., Keitsch, S., Pozgajova, M., Schmid, K. W., Adams, C., Muller, S., Kleuser, B., Edwards, M. J., Grassme, H., Helfrich, I., and Gulbins, E. (2015) Regulation of hematogenous tumor metastasis by acid sphingomyelinase. *EMBO Mol Med* **7**, 714-734
60. Wong, M. L., Xie, B., Beatini, N., Phu, P., Marathe, S., Johns, A., Gold, P. W., Hirsch, E., Williams, K. J., Licinio, J., and Tabas, I. (2000) Acute systemic inflammation up-regulates secretory sphingomyelinase in vivo: a possible link between inflammatory cytokines and atherogenesis. *Proceedings of the National Academy of Sciences of the United States of America* **97**, 8681-8686
61. Schissel, S. L., Jiang, X., Tweedie-Hardman, J., Jeong, T., Camejo, E. H., Najib, J., Rapp, J. H., Williams, K. J., and Tabas, I. (1998) Secretory sphingomyelinase, a product of the acid sphingomyelinase gene, can hydrolyze atherogenic lipoproteins at neutral pH. Implications for atherosclerotic lesion development. *The Journal of biological chemistry* **273**, 2738-2746
62. Devlin, C. M., Leventhal, A. R., Kuriakose, G., Schuchman, E. H., Williams, K. J., and Tabas, I. (2008) Acid sphingomyelinase promotes lipoprotein retention within early atheromata and accelerates lesion progression. *Arterioscler Thromb Vasc Biol* **28**, 1723-1730
63. Santana, P., Pena, L. A., Haimovitz-Friedman, A., Martin, S., Green, D., McLoughlin, M., Cordon-Cardo, C., Schuchman, E. H., Fuks, Z., and Kolesnick, R. (1996) Acid sphingomyelinase-deficient human lymphoblasts and mice are defective in radiation-induced apoptosis. *Cell* **86**, 189-199
64. Okazaki, T., Bielawska, A., Domae, N., Bell, R. M., and Hannun, Y. A. (1994) Characteristics and partial purification of a novel cytosolic, magnesium-independent, neutral sphingomyelinase activated in the early signal transduction of 1 alpha,25-dihydroxyvitamin D3-induced HL-60 cell differentiation. *The Journal of biological chemistry* **269**, 4070-4077
65. Bienias, K., Fiedorowicz, A., Sadowska, A., Prokopiuk, S., and Car, H. (2016) Regulation of sphingomyelin metabolism. *Pharmacol Rep* **68**, 570-581
66. Stoffel, W., Jenke, B., Holz, B., Binczek, E., Gunter, R. H., Knifka, J., Koebke, J., and Niehoff, A. (2007) Neutral sphingomyelinase (SMPD3) deficiency causes a novel form of chondrodysplasia and dwarfism that is rescued by Col2A1-driven smpd3 transgene expression. *Am J Pathol* **171**, 153-161
67. Guenet, J. L., Stanescu, R., Maroteaux, P., and Stanescu, V. (1981) Fragilitas ossium: a new autosomal recessive mutation in the mouse. *J Hered* **72**, 440-441
68. Aubin, I., Adams, C. P., Opsahl, S., Septier, D., Bishop, C. E., Auge, N., Salvayre, R., Negre-Salvayre, A., Goldberg, M., Guenet, J. L., and Poirier, C. (2005) A deletion in the gene encoding sphingomyelin phosphodiesterase 3 (Smpd3) results in osteogenesis and dentinogenesis imperfecta in the mouse. *Nature genetics* **37**, 803-805
69. Poirier, C., Berdyshev, E. V., Dimitropoulou, C., Bogatcheva, N. V., Biddinger, P. W., and Verin, A. D. (2012) Neutral sphingomyelinase 2 deficiency is associated with lung anomalies similar to emphysema. *Mamm Genome* **23**, 758-763



70. Wu, B. X., Rajagopalan, V., Roddy, P. L., Clarke, C. J., and Hannun, Y. A. (2010) Identification and characterization of murine mitochondria-associated neutral sphingomyelinase (MA-nSMase), the mammalian sphingomyelin phosphodiesterase 5. *The Journal of biological chemistry* **285**, 17993-18002
71. Rajagopalan, V., Canals, D., Luberto, C., Snider, J., Voelkel-Johnson, C., Obeid, L. M., and Hannun, Y. A. (2015) Critical determinants of mitochondria-associated neutral sphingomyelinase (MA-nSMase) for mitochondrial localization. *Biochimica et biophysica acta* **1850**, 628-639
72. Morell, P., and Radin, N. S. (1969) Synthesis of cerebroside by brain from uridine diphosphate galactose and ceramide containing hydroxy fatty acid. *Biochemistry* **8**, 506-512
73. Schulte, S., and Stoffel, W. (1993) Ceramide UDPgalactosyltransferase from myelinating rat brain: purification, cloning, and expression. *Proceedings of the National Academy of Sciences of the United States of America* **90**, 10265-10269
74. Bosio, A., Binczek, E., Le Beau, M. M., Fernald, A. A., and Stoffel, W. (1996) The human gene CGT encoding the UDP-galactose ceramide galactosyl transferase (cerebroside synthase): cloning, characterization, and assignment to human chromosome 4, band q26. *Genomics* **34**, 69-75
75. Bosio, A., Binczek, E., and Stoffel, W. (1996) Functional breakdown of the lipid bilayer of the myelin membrane in central and peripheral nervous system by disrupted galactocerebroside synthesis. *Proceedings of the National Academy of Sciences of the United States of America* **93**, 13280-13285
76. Marcus, J., Honigbaum, S., Shroff, S., Honke, K., Rosenbluth, J., and Dupree, J. L. (2006) Sulfatide is essential for the maintenance of CNS myelin and axon structure. *Glia* **53**, 372-381
77. Zoller, I., Bussow, H., Gieselmann, V., and Eckhardt, M. (2005) Oligodendrocyte-specific ceramide galactosyltransferase (CGT) expression phenotypically rescues CGT-deficient mice and demonstrates that CGT activity does not limit brain galactosylceramide level. *Glia* **52**, 190-198
78. Basu, S., Kaufman, B., and Roseman, S. (1968) Enzymatic synthesis of ceramide-glucose and ceramide-lactose by glycosyltransferases from embryonic chicken brain. *The Journal of biological chemistry* **243**, 5802-5804
79. Ichikawa, S., Sakiyama, H., Suzuki, G., Hidari, K. I., and Hirabayashi, Y. (1996) Expression cloning of a cDNA for human ceramide glucosyltransferase that catalyzes the first glycosylation step of glycosphingolipid synthesis. *Proceedings of the National Academy of Sciences of the United States of America* **93**, 4638-4643
80. Yamashita, T., Wada, R., Sasaki, T., Deng, C., Bierfreund, U., Sandhoff, K., and Proia, R. L. (1999) A vital role for glycosphingolipid synthesis during development and differentiation. *Proceedings of the National Academy of Sciences of the United States of America* **96**, 9142-9147
81. Astudillo, L., Therville, N., Colacios, C., Segui, B., Andrieu-Abadie, N., and Levade, T. (2016) Glucosylceramidases and malignancies in mammals. *Biochimie* **125**, 267-280
82. Gouaze-Andersson, V., and Cabot, M. C. (2006) Glycosphingolipids and drug resistance. *Biochimica et biophysica acta* **1758**, 2096-2103

83. Sun, C. C., Zhang, Z., Zhang, S. Y., Li, J., Li, Z. L., and Kong, C. Z. (2012) Up-regulation of glucosylceramide synthase in urinary bladder neoplasms. *Urol Oncol* **30**, 444-449
84. Chatterjee, S., Bedja, D., Mishra, S., Amuzie, C., Avolio, A., Kass, D. A., Berkowitz, D., and Ranehan, M. (2014) Inhibition of glycosphingolipid synthesis ameliorates atherosclerosis and arterial stiffness in apolipoprotein E<sup>-/-</sup> mice and rabbits fed a high-fat and cholesterol diet. *Circulation* **129**, 2403-2413
85. Mishra, S., Bedja, D., Amuzie, C., Avolio, A., and Chatterjee, S. (2015) Prevention of cardiac hypertrophy by the use of a glycosphingolipid synthesis inhibitor in ApoE<sup>-/-</sup> mice. *Biochemical and biophysical research communications* **465**, 159-164
86. Mishra, S., Bedja, D., Amuzie, C., Foss, C. A., Pomper, M. G., Bhattacharya, R., Yarema, K. J., and Chatterjee, S. (2015) Improved intervention of atherosclerosis and cardiac hypertrophy through biodegradable polymer-encapsulated delivery of glycosphingolipid inhibitor. *Biomaterials* **64**, 125-135
87. Tokuda, N., Numata, S., Li, X., Nomura, T., Takizawa, M., Kondo, Y., Yamashita, Y., Hashimoto, N., Kiyono, T., Urano, T., Furukawa, K., and Furukawa, K. (2013) beta4GalT6 is involved in the synthesis of lactosylceramide with less intensity than beta4GalT5. *Glycobiology* **23**, 1175-1183
88. Chatterjee, S., and Pandey, A. (2008) The Yin and Yang of lactosylceramide metabolism: implications in cell function. *Biochimica et biophysica acta* **1780**, 370-382
89. Barneveld, R. A., Keijzer, W., Tegelaers, F. P., Ginns, E. I., Geurts van Kessel, A., Brady, R. O., Barranger, J. A., Tager, J. M., Galjaard, H., Westerveld, A., and Reuser, A. J. (1983) Assignment of the gene coding for human beta-glucocerebrosidase to the region q21-q31 of chromosome 1 using monoclonal antibodies. *Hum Genet* **64**, 227-231
90. Sorge, J., West, C., Westwood, B., and Beutler, E. (1985) Molecular cloning and nucleotide sequence of human glucocerebrosidase cDNA. *Proceedings of the National Academy of Sciences of the United States of America* **82**, 7289-7293
91. Brady, R. O., Kanfer, J. N., and Shapiro, D. (1965) Metabolism of Glucocerebrosides. li. Evidence of an Enzymatic Deficiency in Gaucher's Disease. *Biochemical and biophysical research communications* **18**, 221-225
92. Cox, T. M. (2010) Gaucher disease: clinical profile and therapeutic developments. *Biologics* **4**, 299-313
93. Bendikov-Bar, I., and Horowitz, M. (2012) Gaucher disease paradigm: from ERAD to comorbidity. *Hum Mutat* **33**, 1398-1407
94. Dandana, A., Ben Khelifa, S., Chahed, H., Miled, A., and Ferchichi, S. (2016) Gaucher Disease: Clinical, Biological and Therapeutic Aspects. *Pathobiology* **83**, 13-23
95. Velayati, A., Yu, W. H., and Sidransky, E. (2010) The role of glucocerebrosidase mutations in Parkinson disease and Lewy body disorders. *Curr Neurol Neurosci Rep* **10**, 190-198
96. Goker-Alpan, O., Schiffmann, R., LaMarca, M. E., Nussbaum, R. L., McInerney-Leo, A., and Sidransky, E. (2004) Parkinsonism among Gaucher disease carriers. *J Med Genet* **41**, 937-940
97. Halperin, A., Elstein, D., and Zimran, A. (2006) Increased incidence of Parkinson disease among relatives of patients with Gaucher disease. *Blood Cells Mol Dis* **36**, 426-428

98. Presa, N., Gomez-Larrauri, A., Rivera, I. G., Ordonez, M., Trueba, M., and Gomez-Munoz, A. (2016) Regulation of cell migration and inflammation by ceramide 1-phosphate. *Biochimica et biophysica acta* **1861**, 402-409
99. Simanshu, D. K., Kamlekar, R. K., Wijesinghe, D. S., Zou, X., Zhai, X., Mishra, S. K., Molotkovsky, J. G., Malinina, L., Hinchcliffe, E. H., Chalfant, C. E., Brown, R. E., and Patel, D. J. (2013) Non-vesicular trafficking by a ceramide-1-phosphate transfer protein regulates eicosanoids. *Nature* **500**, 463-467
100. Sugiura, M., Kono, K., Liu, H., Shimizugawa, T., Minekura, H., Spiegel, S., and Kohama, T. (2002) Ceramide kinase, a novel lipid kinase. Molecular cloning and functional characterization. *The Journal of biological chemistry* **277**, 23294-23300
101. Lamour, N. F., Stahelin, R. V., Wijesinghe, D. S., Maceyka, M., Wang, E., Allegood, J. C., Merrill, A. H., Jr., Cho, W., and Chalfant, C. E. (2007) Ceramide kinase uses ceramide provided by ceramide transport protein: localization to organelles of eicosanoid synthesis. *Journal of lipid research* **48**, 1293-1304
102. Tuson, M., Marfany, G., and Gonzalez-Duarte, R. (2004) Mutation of CERKL, a novel human ceramide kinase gene, causes autosomal recessive retinitis pigmentosa (RP26). *Am J Hum Genet* **74**, 128-138
103. Avila-Fernandez, A., Riveiro-Alvarez, R., Vallespin, E., Wilke, R., Tapias, I., Cantalapiedra, D., Aguirre-Lamban, J., Gimenez, A., Trujillo-Tiebas, M. J., and Ayuso, C. (2008) CERKL mutations and associated phenotypes in seven Spanish families with autosomal recessive retinitis pigmentosa. *Invest Ophthalmol Vis Sci* **49**, 2709-2713
104. Mitsutake, S., Yokose, U., Kato, M., Matsuoka, I., Yoo, J. M., Kim, T. J., Yoo, H. S., Fujimoto, K., Ando, Y., Sugiura, M., Kohama, T., and Igarashi, Y. (2007) The generation and behavioral analysis of ceramide kinase-null mice, indicating a function in cerebellar Purkinje cells. *Biochemical and biophysical research communications* **363**, 519-524
105. Graf, C., Zemann, B., Rovina, P., Urtz, N., Schanzer, A., Reuschel, R., Mechtcheriakova, D., Muller, M., Fischer, E., Reichel, C., Huber, S., Dawson, J., Meingassner, J. G., Billich, A., Niwa, S., Badegruber, R., Van Veldhoven, P. P., Kinzel, B., Baumruker, T., and Bornancin, F. (2008) Neutropenia with impaired immune response to *Streptococcus pneumoniae* in ceramide kinase-deficient mice. *J Immunol* **180**, 3457-3466
106. Mitsutake, S., Date, T., Yokota, H., Sugiura, M., Kohama, T., and Igarashi, Y. (2012) Ceramide kinase deficiency improves diet-induced obesity and insulin resistance. *FEBS letters* **586**, 1300-1305
107. Mao, C., and Obeid, L. M. (2008) Ceramidases: regulators of cellular responses mediated by ceramide, sphingosine, and sphingosine-1-phosphate. *Biochimica et biophysica acta* **1781**, 424-434
108. Li, C. M., Park, J. H., He, X., Levy, B., Chen, F., Arai, K., Adler, D. A., Disteche, C. M., Koch, J., Sandhoff, K., and Schuchman, E. H. (1999) The human acid ceramidase gene (ASAH): structure, chromosomal location, mutation analysis, and expression. *Genomics* **62**, 223-231
109. Ehlert, K., Frosch, M., Fehse, N., Zander, A., Roth, J., and Vormoor, J. (2007) Farber disease: clinical presentation, pathogenesis and a new approach to treatment. *Pediatr Rheumatol Online J* **5**, 15
110. Sugita, M., Dulaney, J. T., and Moser, H. W. (1972) Ceramidase deficiency in Farber's disease (lipogranulomatosis). *Science* **178**, 1100-1102

111. Mehta, S., Blackinton, D., Omar, I., Kouttab, N., Myrick, D., Klostergaard, J., and Wanebo, H. (2000) Combined cytotoxic action of paclitaxel and ceramide against the human Tu138 head and neck squamous carcinoma cell line. *Cancer Chemother Pharmacol* **46**, 85-92
112. Realini, N., Palese, F., Pizzirani, D., Pontis, S., Basit, A., Bach, A., Ganesan, A., and Piomelli, D. (2016) Acid Ceramidase in Melanoma: EXPRESSION, LOCALIZATION, AND EFFECTS OF PHARMACOLOGICAL INHIBITION. *J Biol Chem* **291**, 2422-2434
113. Bedia, C., Casas, J., Andrieu-Abadie, N., Fabrias, G., and Levade, T. (2011) Acid ceramidase expression modulates the sensitivity of A375 melanoma cells to dacarbazine. *J Biol Chem* **286**, 28200-28209
114. Cheng, J. C., Bai, A., Beckham, T. H., Marrison, S. T., Yount, C. L., Young, K., Lu, P., Bartlett, A. M., Wu, B. X., Keane, B. J., Armeson, K. E., Marshall, D. T., Keane, T. E., Smith, M. T., Jones, E. E., Drake, R. R., Jr., Bielawska, A., Norris, J. S., and Liu, X. (2013) Radiation-induced acid ceramidase confers prostate cancer resistance and tumor relapse. *J Clin Invest* **123**, 4344-4358
115. Coant, N., Sakamoto, W., Mao, C., and Hannun, Y. A. (2017) Ceramidases, roles in sphingolipid metabolism and in health and disease. *Adv Biol Regul* **63**, 122-131
116. Li, C. M., Park, J. H., Simonaro, C. M., He, X., Gordon, R. E., Friedman, A. H., Ehleiter, D., Paris, F., Manova, K., Hepbildikler, S., Fuks, Z., Sandhoff, K., Kolesnick, R., and Schuchman, E. H. (2002) Insertional mutagenesis of the mouse acid ceramidase gene leads to early embryonic lethality in homozygotes and progressive lipid storage disease in heterozygotes. *Genomics* **79**, 218-224
117. El Bawab, S., Roddy, P., Qian, T., Bielawska, A., Lemasters, J. J., and Hannun, Y. A. (2000) Molecular cloning and characterization of a human mitochondrial ceramidase. *The Journal of biological chemistry* **275**, 21508-21513
118. Novgorodov, S. A., Riley, C. L., Yu, J., Borg, K. T., Hannun, Y. A., Proia, R. L., Kindy, M. S., and Gudz, T. I. (2014) Essential roles of neutral ceramidase and sphingosine in mitochondrial dysfunction due to traumatic brain injury. *J Biol Chem* **289**, 13142-13154
119. Snider, A. J., Wu, B. X., Jenkins, R. W., Sticca, J. A., Kawamori, T., Hannun, Y. A., and Obeid, L. M. (2012) Loss of neutral ceramidase increases inflammation in a mouse model of inflammatory bowel disease. *Prostaglandins & other lipid mediators* **99**, 124-130
120. Garcia-Barros, M., Coant, N., Kawamori, T., Wada, M., Snider, A. J., Truman, J. P., Wu, B. X., Furuya, H., Clarke, C. J., Bialkowska, A. B., Ghaleb, A., Yang, V. W., Obeid, L. M., and Hannun, Y. A. (2016) Role of neutral ceramidase in colon cancer. *FASEB J* **30**, 4159-4171
121. Sundaram, K., Mather, A. R., Marimuthu, S., Shah, P. P., Snider, A. J., Obeid, L. M., Hannun, Y. A., Beverly, L. J., and Siskind, L. J. (2016) Loss of neutral ceramidase protects cells from nutrient- and energy -deprivation-induced cell death. *Biochem J* **473**, 743-755
122. Kono, M., Dreier, J. L., Ellis, J. M., Allende, M. L., Kalkofen, D. N., Sanders, K. M., Bielawski, J., Bielawska, A., Hannun, Y. A., and Proia, R. L. (2006) Neutral ceramidase encoded by the Asah2 gene is essential for the intestinal degradation of sphingolipids. *J Biol Chem* **281**, 7324-7331
123. Osawa, Y., Uchinami, H., Bielawski, J., Schwabe, R. F., Hannun, Y. A., and Brenner, D. A. (2005) Roles for C16-ceramide and sphingosine 1-phosphate in regulating hepatocyte apoptosis in response to tumor necrosis factor-alpha. *The Journal of biological chemistry* **280**, 27879-27887
124. Mao, C., Xu, R., Bielawska, A., and Obeid, L. M. (2000) Cloning of an alkaline ceramidase from *Saccharomyces cerevisiae*. An enzyme with reverse (CoA-independent) ceramide synthase activity. *J Biol Chem* **275**, 6876-6884

125. Mao, C., Xu, R., Bielawska, A., Szulc, Z. M., and Obeid, L. M. (2000) Cloning and characterization of a *Saccharomyces cerevisiae* alkaline ceramidase with specificity for dihydroceramide. *J Biol Chem* **275**, 31369-31378
126. Liakath-Ali, K., Vancollie, V. E., Lelliott, C. J., Speak, A. O., Lafont, D., Protheroe, H. J., Ingvorsen, C., Galli, A., Green, A., Gleeson, D., Ryder, E., Glover, L., Vizcay-Barrena, G., Karp, N. A., Arends, M. J., Brenn, T., Spiegel, S., Adams, D. J., Watt, F. M., and van der Weyden, L. (2016) Alkaline ceramidase 1 is essential for mammalian skin homeostasis and regulating whole-body energy expenditure. *J Pathol* **239**, 374-383
127. Xu, R., Wang, K., Mileva, I., Hannun, Y. A., Obeid, L. M., and Mao, C. (2016) Alkaline ceramidase 2 and its bioactive product sphingosine are novel regulators of the DNA damage response. *Oncotarget* **7**, 18440-18457
128. Wang, K., Xu, R., Snider, A. J., Schrandt, J., Li, Y., Bialkowska, A. B., Li, M., Zhou, J., Hannun, Y. A., Obeid, L. M., Yang, V. W., and Mao, C. (2016) Alkaline ceramidase 3 deficiency aggravates colitis and colitis-associated tumorigenesis in mice by hyperactivating the innate immune system. *Cell Death Dis* **7**, e2124
129. Wang, K., Xu, R., Schrandt, J., Shah, P., Gong, Y. Z., Preston, C., Wang, L., Yi, J. K., Lin, C. L., Sun, W., Spyropoulos, D. D., Rhee, S., Li, M., Zhou, J., Ge, S., Zhang, G., Snider, A. J., Hannun, Y. A., Obeid, L. M., and Mao, C. (2015) Alkaline Ceramidase 3 Deficiency Results in Purkinje Cell Degeneration and Cerebellar Ataxia Due to Dyshomeostasis of Sphingolipids in the Brain. *PLoS Genet* **11**, e1005591
130. Chen, C., Yin, Y., Li, C., Chen, J., Xie, J., Lu, Z., Li, M., Wang, Y., and Zhang, C. C. (2016) ACER3 supports development of acute myeloid leukemia. *Biochem Biophys Res Commun* **478**, 33-38
131. Edvardson, S., Yi, J. K., Jalas, C., Xu, R., Webb, B. D., Snider, J., Fedick, A., Kleinman, E., Treff, N. R., Mao, C., and Elpeleg, O. (2016) Deficiency of the alkaline ceramidase ACER3 manifests in early childhood by progressive leukodystrophy. *J Med Genet* **53**, 389-396
132. Kapitonov, D., Allegood, J. C., Mitchell, C., Hait, N. C., Almenara, J. A., Adams, J. K., Zipkin, R. E., Dent, P., Kordula, T., Milstien, S., and Spiegel, S. (2009) Targeting sphingosine kinase 1 inhibits Akt signaling, induces apoptosis, and suppresses growth of human glioblastoma cells and xenografts. *Cancer Res* **69**, 6915-6923
133. Watson, C., Long, J. S., Orange, C., Tannahill, C. L., Mallon, E., McGlynn, L. M., Pyne, S., Pyne, N. J., and Edwards, J. (2010) High expression of sphingosine 1-phosphate receptors, S1P1 and S1P3, sphingosine kinase 1, and extracellular signal-regulated kinase-1/2 is associated with development of tamoxifen resistance in estrogen receptor-positive breast cancer patients. *Am J Pathol* **177**, 2205-2215
134. Long, J. S., Edwards, J., Watson, C., Tovey, S., Mair, K. M., Schiff, R., Natarajan, V., Pyne, N. J., and Pyne, S. (2010) Sphingosine kinase 1 induces tolerance to human epidermal growth factor receptor 2 and prevents formation of a migratory phenotype in response to sphingosine 1-phosphate in estrogen receptor-positive breast cancer cells. *Mol Cell Biol* **30**, 3827-3841
135. Pchejetski, D., Doumerc, N., Golzio, M., Naymark, M., Teissie, J., Kohama, T., Waxman, J., Malavaud, B., and Cuvillier, O. (2008) Chemosensitizing effects of sphingosine kinase-1 inhibition in prostate cancer cell and animal models. *Mol Cancer Ther* **7**, 1836-1845
136. Nava, V. E., Hobson, J. P., Murthy, S., Milstien, S., and Spiegel, S. (2002) Sphingosine kinase type 1 promotes estrogen-dependent tumorigenesis of breast cancer MCF-7 cells. *Experimental cell research* **281**, 115-127
137. Pyne, N. J., and Pyne, S. (2010) Sphingosine 1-phosphate and cancer. *Nature reviews. Cancer* **10**, 489-503

138. Powell, J. A., Lewis, A. C., Zhu, W., Toubia, J., Pitman, M. R., Wallington-Beddoe, C. T., Moretti, P. A., Iarossi, D., Samaraweera, S. E., Cummings, N., Ramshaw, H. S., Thomas, D., Wei, A. H., Lopez, A. F., D'Andrea, R. J., Lewis, I. D., and Pitson, S. M. (2017) Targeting sphingosine kinase 1 induces MCL1-dependent cell death in acute myeloid leukemia. *Blood* **129**, 771-782
139. Li, Q. F., Huang, W. R., Duan, H. F., Wang, H., Wu, C. T., and Wang, L. S. (2007) Sphingosine kinase-1 mediates BCR/ABL-induced upregulation of Mcl-1 in chronic myeloid leukemia cells. *Oncogene* **26**, 7904-7908
140. Salama, M. F., Carroll, B., Adada, M., Pulkoski-Gross, M., Hannun, Y. A., and Obeid, L. M. (2015) A novel role of sphingosine kinase-1 in the invasion and angiogenesis of VHL mutant clear cell renal cell carcinoma. *FASEB journal : official publication of the Federation of American Societies for Experimental Biology* **29**, 2803-2813
141. Pettus, B. J., Bielawski, J., Porcelli, A. M., Reames, D. L., Johnson, K. R., Morrow, J., Chalfant, C. E., Obeid, L. M., and Hannun, Y. A. (2003) The sphingosine kinase 1/sphingosine-1-phosphate pathway mediates COX-2 induction and PGE2 production in response to TNF-alpha. *FASEB journal : official publication of the Federation of American Societies for Experimental Biology* **17**, 1411-1421
142. Billich, A., Bornancin, F., Mechtcheriakova, D., Natt, F., Huesken, D., and Baumruker, T. (2005) Basal and induced sphingosine kinase 1 activity in A549 carcinoma cells: function in cell survival and IL-1beta and TNF-alpha induced production of inflammatory mediators. *Cell Signal* **17**, 1203-1217
143. Xia, P., Gamble, J. R., Rye, K. A., Wang, L., Hii, C. S., Cockerill, P., Khew-Goodall, Y., Bert, A. G., Barter, P. J., and Vadas, M. A. (1998) Tumor necrosis factor-alpha induces adhesion molecule expression through the sphingosine kinase pathway. *Proc Natl Acad Sci U S A* **95**, 14196-14201
144. Kawamori, T., Kaneshiro, T., Okumura, M., Maalouf, S., Uflacker, A., Bielawski, J., Hannun, Y. A., and Obeid, L. M. (2009) Role for sphingosine kinase 1 in colon carcinogenesis. *FASEB journal : official publication of the Federation of American Societies for Experimental Biology* **23**, 405-414
145. Heffernan-Stroud, L. A., Helke, K. L., Jenkins, R. W., De Costa, A. M., Hannun, Y. A., and Obeid, L. M. (2012) Defining a role for sphingosine kinase 1 in p53-dependent tumors. *Oncogene* **31**, 1166-1175
146. Michaud, J., Kohno, M., Proia, R. L., and Hla, T. (2006) Normal acute and chronic inflammatory responses in sphingosine kinase 1 knockout mice. *FEBS Lett* **580**, 4607-4612
147. Lai, W. Q., Irwan, A. W., Goh, H. H., Melendez, A. J., McInnes, I. B., and Leung, B. P. (2009) Distinct roles of sphingosine kinase 1 and 2 in murine collagen-induced arthritis. *J Immunol* **183**, 2097-2103
148. Baker, D. A., Barth, J., Chang, R., Obeid, L. M., and Gilkeson, G. S. (2010) Genetic sphingosine kinase 1 deficiency significantly decreases synovial inflammation and joint erosions in murine TNF-alpha-induced arthritis. *J Immunol* **185**, 2570-2579
149. Adada, M. M., Canals, D., Jeong, N., Kelkar, A. D., Hernandez-Corbacho, M., Pulkoski-Gross, M. J., Donaldson, J. C., Hannun, Y. A., and Obeid, L. M. (2015) Intracellular sphingosine kinase 2-derived sphingosine-1-phosphate mediates epidermal growth factor-induced ezrin-radixin-moesin phosphorylation and cancer cell invasion. *FASEB journal : official publication of the Federation of American Societies for Experimental Biology* **29**, 4654-4669

150. Venkata, J. K., An, N., Stuart, R., Costa, L. J., Cai, H., Coker, W., Song, J. H., Gibbs, K., Matson, T., Garrett-Mayer, E., Wan, Z., Ogretmen, B., Smith, C., and Kang, Y. (2014) Inhibition of sphingosine kinase 2 downregulates the expression of c-Myc and Mcl-1 and induces apoptosis in multiple myeloma. *Blood* **124**, 1915-1925
151. Snider, A. J., Ruiz, P., Obeid, L. M., and Oates, J. C. (2013) Inhibition of sphingosine kinase-2 in a murine model of lupus nephritis. *PLoS One* **8**, e53521
152. Mandala, S. M., Thornton, R., Galve-Roperh, I., Poulton, S., Peterson, C., Olivera, A., Bergstrom, J., Kurtz, M. B., and Spiegel, S. (2000) Molecular cloning and characterization of a lipid phosphohydrolase that degrades sphingosine-1-phosphate and induces cell death. *Proceedings of the National Academy of Sciences of the United States of America* **97**, 7859-7864
153. Ogawa, C., Kihara, A., Gokoh, M., and Igarashi, Y. (2003) Identification and characterization of a novel human sphingosine-1-phosphate phosphohydrolase, hSPP2. *The Journal of biological chemistry* **278**, 1268-1272
154. Long, J., Darroch, P., Wan, K. F., Kong, K. C., Ktistakis, N., Pyne, N. J., and Pyne, S. (2005) Regulation of cell survival by lipid phosphate phosphatases involves the modulation of intracellular phosphatidic acid and sphingosine 1-phosphate pools. *The Biochemical journal* **391**, 25-32
155. Johnson, K. R., Johnson, K. Y., Becker, K. P., Bielawski, J., Mao, C., and Obeid, L. M. (2003) Role of human sphingosine-1-phosphate phosphatase 1 in the regulation of intra- and extracellular sphingosine-1-phosphate levels and cell viability. *The Journal of biological chemistry* **278**, 34541-34547
156. Le Stunff, H., Galve-Roperh, I., Peterson, C., Milstien, S., and Spiegel, S. (2002) Sphingosine-1-phosphate phosphohydrolase in regulation of sphingolipid metabolism and apoptosis. *J Cell Biol* **158**, 1039-1049
157. Ruoming, W., Zhen, Y., Tengeng, Z., and Jisheng, H. (2015) Tumor suppressor microRNA-31 inhibits gastric carcinogenesis by targeting Smad4 and SGPP2. *Cancer Gene Ther* **22**, 564-572
158. Stoffel, W., LeKim, D., and Sticht, G. (1969) Distribution and properties of dihydrosphingosine-1-phosphate aldolase (sphinganine-1-phosphate alkanal-lyase). *Hoppe Seylers Z Physiol Chem* **350**, 1233-1241
159. Saba, J. D., Nara, F., Bielawska, A., Garrett, S., and Hannun, Y. A. (1997) The BST1 gene of *Saccharomyces cerevisiae* is the sphingosine-1-phosphate lyase. *J Biol Chem* **272**, 26087-26090
160. Fyrst, H., and Saba, J. D. (2008) Sphingosine-1-phosphate lyase in development and disease: sphingolipid metabolism takes flight. *Biochimica et biophysica acta* **1781**, 448-458
161. Zhou, J., and Saba, J. D. (1998) Identification of the first mammalian sphingosine phosphate lyase gene and its functional expression in yeast. *Biochem Biophys Res Commun* **242**, 502-507
162. Allende, M. L., Bektas, M., Lee, B. G., Bonifacino, E., Kang, J., Tuymetova, G., Chen, W., Saba, J. D., and Proia, R. L. (2011) Sphingosine-1-phosphate lyase deficiency produces a pro-inflammatory response while impairing neutrophil trafficking. *The Journal of biological chemistry* **286**, 7348-7358

163. Bektas, M., Allende, M. L., Lee, B. G., Chen, W., Amar, M. J., Remaley, A. T., Saba, J. D., and Proia, R. L. (2010) Sphingosine 1-phosphate lyase deficiency disrupts lipid homeostasis in liver. *J Biol Chem* **285**, 10880-10889
164. Schmahl, J., Raymond, C. S., and Soriano, P. (2007) PDGF signaling specificity is mediated through multiple immediate early genes. *Nat Genet* **39**, 52-60
165. Degagne, E., Pandurangan, A., Bandhuvula, P., Kumar, A., Eltanawy, A., Zhang, M., Yoshinaga, Y., Nefedov, M., de Jong, P. J., Fong, L. G., Young, S. G., Bittman, R., Ahmedi, Y., and Saba, J. D. (2014) Sphingosine-1-phosphate lyase downregulation promotes colon carcinogenesis through STAT3-activated microRNAs. *The Journal of clinical investigation* **124**, 5368-5384
166. Bandhuvula, P., Honbo, N., Wang, G. Y., Jin, Z. Q., Fyrst, H., Zhang, M., Borowsky, A. D., Dillard, L., Karliner, J. S., and Saba, J. D. (2011) S1P lyase: a novel therapeutic target for ischemia-reperfusion injury of the heart. *Am J Physiol Heart Circ Physiol* **300**, H1753-1761
167. Berdyshev, E. V., Gorshkova, I., Usatyuk, P., Kalari, S., Zhao, Y., Pyne, N. J., Pyne, S., Sabbadini, R. A., Garcia, J. G., and Natarajan, V. (2011) Intracellular S1P generation is essential for S1P-induced motility of human lung endothelial cells: role of sphingosine kinase 1 and S1P lyase. *PLoS One* **6**, e16571
168. Kumar, A., Oskouian, B., Fyrst, H., Zhang, M., Paris, F., and Saba, J. D. (2011) S1P lyase regulates DNA damage responses through a novel sphingolipid feedback mechanism. *Cell Death Dis* **2**, e119
