# Supplementary material
Source: PubMed Central journal article supplement (PMC5902181)
Supplement: NIHMS956838-supplement-sup_2.pdf [file NIHMS956838-supplement-sup_2.pdf]

**Supplementary information S2. Sphingolipid species and key cellular functions**

| Sphingolipid species                                                                                                                                                                                                                                                                                                                                                                                                                                      | Function                                               |                                                                                                                                                     | Reference |
|-----------------------------------------------------------------------------------------------------------------------------------------------------------------------------------------------------------------------------------------------------------------------------------------------------------------------------------------------------------------------------------------------------------------------------------------------------------|--------------------------------------------------------|-----------------------------------------------------------------------------------------------------------------------------------------------------|-----------|
| <p style="text-align: center;"><b>Ceramide</b></p> 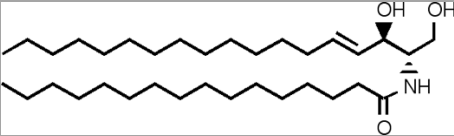 <p>The image shows the chemical structure of a ceramide. It consists of a sphingosine backbone with two long hydrocarbon chains (one saturated and one monounsaturated), a primary amine group (NH), and two hydroxyl groups (OH) on the sphingosine ring. The label 'Ceramide' is centered above the structure.</p> | Cell death                                             | <p>↑C18-ceramide in chemotherapy-induced cell death in human head and neck squamous cell carcinomas (HNSCC)</p>                                     | (1,2)     |
|                                                                                                                                                                                                                                                                                                                                                                                                                                                           |                                                        | <p>↑C16-ceramide via CerS activation induced by a variety of cell stressors<br/>Exogenous C16-ceramide<br/>↑C16 and C24-ceramide in neutrophils</p> | (3-15)    |
|                                                                                                                                                                                                                                                                                                                                                                                                                                                           |                                                        | <p>↓C16-ceramide via CerS6 downregulation in human head and neck squamous cell carcinomas (HNSCC)</p>                                               | (16,17)   |
|                                                                                                                                                                                                                                                                                                                                                                                                                                                           |                                                        | <p>↑C16-ceramide induced by acid ceramidase inhibition</p>                                                                                          | (18,19)   |
|                                                                                                                                                                                                                                                                                                                                                                                                                                                           |                                                        | <p>Exogenous C16-ceramide<br/>ASMase-dependent C16-ceramide generation</p>                                                                          | (20)      |
|                                                                                                                                                                                                                                                                                                                                                                                                                                                           | Cell differentiation                                   | <p>↑Total ceramides</p>                                                                                                                             | (21,22)   |
|                                                                                                                                                                                                                                                                                                                                                                                                                                                           | Stimulation of cell migration/ invasion in cancer cell | <p>↓C16-ceramide via downregulation of <i>LASS6</i> during epithelial-to-mesenchymal transition (EMT)</p>                                           | (23)      |
|                                                                                                                                                                                                                                                                                                                                                                                                                                                           |                                                        | <p>↑Ceramide in arsenic trioxide (ATO) in hepatocarcinoma HCCLM3 cells</p>                                                                          | (24)      |
|                                                                                                                                                                                                                                                                                                                                                                                                                                                           | Cell proliferation                                     | <p>↑C24 and C24:1-ceramide via overexpression of CerS2</p>                                                                                          | (8,25)    |
|                                                                                                                                                                                                                                                                                                                                                                                                                                                           | Cell cycle arrest                                      | <p>Exogenous C2- or C6-ceramides</p>                                                                                                                | (26-28)   |
| Senescence                                                                                                                                                                                                                                                                                                                                                                                                                                                | <p>↑Total ceramide<br/>Exogenous C8-ceramide</p>       | (29-31)                                                                                                                                             |           |
| Necrosis                                                                                                                                                                                                                                                                                                                                                                                                                                                  | <p>↑Total ceramides</p>                                | (32)                                                                                                                                                |           |

|                                                                                                                           |                                                                                                                                                                                                          |                                                                                                         |            |
|---------------------------------------------------------------------------------------------------------------------------|----------------------------------------------------------------------------------------------------------------------------------------------------------------------------------------------------------|---------------------------------------------------------------------------------------------------------|------------|
|                                                                                                                           |                                                                                                                                                                                                          | Exogenous C2- or C6-ceramides                                                                           |            |
|                                                                                                                           | Necroptosis                                                                                                                                                                                              | Exogenous C16-ceramide                                                                                  | (33)       |
|                                                                                                                           |                                                                                                                                                                                                          | ↑C16-ceramide in TNF $\alpha$ -treated cells                                                            | (34-36)    |
|                                                                                                                           | Autophagy                                                                                                                                                                                                | ↑ceramide due to cell stressor<br>Exogenous C2- or C6-ceramides and tamoxifen-treated cell              | (37-39)    |
|                                                                                                                           |                                                                                                                                                                                                          | ↑C16-ceramide                                                                                           | (40,41)    |
|                                                                                                                           | Mitophagy                                                                                                                                                                                                | ↑C18-ceramide via CerS1 activity                                                                        | (42)       |
|                                                                                                                           | Cytoskeleton rearrangement                                                                                                                                                                               | ↑Total ceramides via activation of aSMase or exogenous bSMase                                           | (43-46)    |
| Insulin resistance and cellular metabolism                                                                                | ↑Total ceramides in high fat diet HFD administration and/or palmitate treatment via CerS, nSMase or aSMase activity<br>↑C16-ceramide due to CerS6 upregulation upon HFD<br>Exogenous C2- or C6-ceramides | (47-52)                                                                                                 |            |
| <p><b>Sphingosine-1-phosphate</b></p> 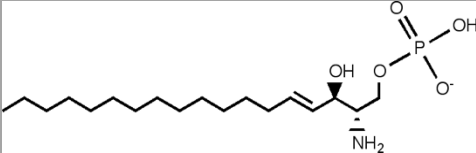 | Cell survival                                                                                                                                                                                            | ↑S1P                                                                                                    | (13,53,54) |
|                                                                                                                           | Autophagy                                                                                                                                                                                                | Exogenous S1P<br>↑S1P via overexpression of SK1 during cell starvation                                  | (55-58)    |
|                                                                                                                           | Inflammation                                                                                                                                                                                             | ↑S1P in TNF $\alpha$ -treated cells<br>↑S1P in S1P lyase-deficient mice<br>↑S1P via upregulation of SK1 | (59-66)    |

|                                                                                                                                                    |                             |                                                                                                                                                                                                     |            |
|----------------------------------------------------------------------------------------------------------------------------------------------------|-----------------------------|-----------------------------------------------------------------------------------------------------------------------------------------------------------------------------------------------------|------------|
|                                                                                                                                                    | Cell migration and invasion | <p>↑S1P via SK2 activation during EGF stimulation</p> <p>↑S1P via overexpression of SK2 or ACER2</p> <p>↑S1P via SK1 mRNA and/or protein expressions in cancer cells</p> <p>Exogenous S1P</p>       | (67-71)    |
|                                                                                                                                                    | Cytoskeleton rearrangement  | <p>↑S1P in bSMase/bCDase-treated HeLa cells</p> <p>↑S1P in EGF-treated cells</p> <p>Exogenous S1P</p> <p>↑Total ceramide via activation of aSMase in cisplatin-treated cells</p>                    | (43-45,72) |
| <p style="text-align: center;"><b>Sphingosine</b></p> 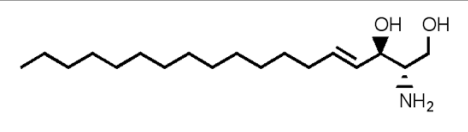            | Apoptosis                   | <p>↑Sphingosine in cancer cells induced by environmental stress, chemotherapeutic treatment and apoptotic stimulus</p> <p>Exogenous sphingosine treatment</p> <p>↑Sphingosine via SK inhibition</p> | (73-79)    |
|                                                                                                                                                    | Cell cycle arrest           | <p>↑Sphingosine during DNA damage</p> <p>↑Sphingosine via upregulation of ACER2</p> <p>Exogenous sphingosine</p>                                                                                    | (79-81)    |
|                                                                                                                                                    | Cell differentiation        | <p>↑Sphingosine via upregulation of haCER1 and ACDase in human epidermal keratinocytes</p> <p>Exogenous sphingosine</p>                                                                             | (22,82)    |
| <p style="text-align: center;"><b>Ceramide-1-phosphate</b></p>  | Cell migration              | <p>↑Ceramide-1-phosphate by upregulation of CerK</p> <p>Exogenous ceramide-1-phosphate treatment</p>                                                                                                | (83-86)    |
|                                                                                                                                                    | Cell proliferation          | <p>Exogenous ceramide-1-phosphate</p> <p>↑Ceramide-1-phosphate in cells overexpressing CerK</p> <p>↑Ceramide-1-phosphate production in cells culture in medium supplemented with FBS</p>            | (84,87,88) |
|                                                                                                                                                    | Inhibition of apoptosis     | <p>Exogenous ceramide-1-phosphate</p>                                                                                                                                                               | (89-91)    |

|                                                                                                                                                                                                                                                                                                                                                                                                                                                                                                             |                            |                                                                                                                                                                                                     |           |
|-------------------------------------------------------------------------------------------------------------------------------------------------------------------------------------------------------------------------------------------------------------------------------------------------------------------------------------------------------------------------------------------------------------------------------------------------------------------------------------------------------------|----------------------------|-----------------------------------------------------------------------------------------------------------------------------------------------------------------------------------------------------|-----------|
|                                                                                                                                                                                                                                                                                                                                                                                                                                                                                                             | Regulation of inflammation | Exogenous ceramide-1-phosphate<br>↑Ceramide-1-phosphate via CerK upregulation upon IL-1β or TNFα treatment, or stimulation of resting macrophages with macrophage-colony stimulating factor (M-CSF) | (92-99)   |
| <p style="text-align: center;"><b>Dihydroceramide</b></p> 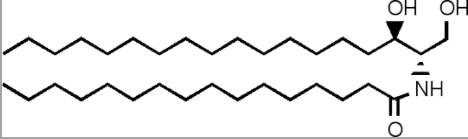 <p>The image shows the chemical structure of a dihydroceramide. It consists of two long, saturated hydrocarbon chains (fatty acids) attached to a sphingosine backbone. The sphingosine backbone has a primary amine group (NH) and two hydroxyl groups (OH) on the dihydroxyethyl side chain.</p>                                                              | Cell cycle arrest          | ↑Total dihydroceramides via downregulation of DEGS1 gene                                                                                                                                            | (100)     |
|                                                                                                                                                                                                                                                                                                                                                                                                                                                                                                             | Apoptosis                  | ↑C16-dihydroceramide                                                                                                                                                                                | (100,101) |
|                                                                                                                                                                                                                                                                                                                                                                                                                                                                                                             |                            | ↑C16-dihydroceramide in fenretinide-treated cells                                                                                                                                                   | (102-104) |
|                                                                                                                                                                                                                                                                                                                                                                                                                                                                                                             |                            | ↑C22 and C24-dihydroceramide in T-Cell acute lymphoblastic leukemia cell lines                                                                                                                      | (105)     |
|                                                                                                                                                                                                                                                                                                                                                                                                                                                                                                             | Inhibition of cell growth  | ↑C16-dihydroceramide induced by the sphingosine kinase 2 inhibitor ABC294640 in TRAMP-C2 cells                                                                                                      | (106)     |
| <p style="text-align: center;"><b>Sphingomyelin</b></p>  <p>The image shows the chemical structure of sphingomyelin. It features a sphingosine backbone with a primary amine group (NH) and a hydroxyl group (OH) on the dihydroxyethyl side chain. The sphingosine is linked to a long-chain fatty acid via an amide bond. The sphingosine is also linked to a phosphocholine head group via a phosphodiester bond.</p> | Cell growth                | ↑Sphingomyelin via SMS1 overexpression<br>Exogenous sphingomyelin                                                                                                                                   | (112-114) |
|                                                                                                                                                                                                                                                                                                                                                                                                                                                                                                             |                            | ↑Sphingomyelin via basic fibroblast growth factor (bFGF)-dependent stimulation of SMS                                                                                                               | (112-114) |
|                                                                                                                                                                                                                                                                                                                                                                                                                                                                                                             | Cell adhesion              | ↑Sphingomyelin in cells treated with phorbol-ester stimulated cell adhesion                                                                                                                         | (115,116) |
|                                                                                                                                                                                                                                                                                                                                                                                                                                                                                                             |                            | ↓Sphingomyelin by nSMase treatment caused detachment                                                                                                                                                | (115,116) |

|                                                                                                                                                                                                                                                                                                                                                                                            |                                             |                                                                                                                                                                                                                  |                      |
|--------------------------------------------------------------------------------------------------------------------------------------------------------------------------------------------------------------------------------------------------------------------------------------------------------------------------------------------------------------------------------------------|---------------------------------------------|------------------------------------------------------------------------------------------------------------------------------------------------------------------------------------------------------------------|----------------------|
| <p style="text-align: center;"><b>Galactosylceramide</b></p> 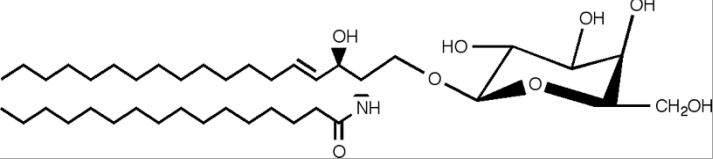                                                                                                                                                                                                                                             | <p>Inflammation</p>                         | <p>↑Galactosylceramides in GALC mutant mice<br/>Exogenous galactosylceramide treatment stimulates Natural Killer T (NKT) cell</p>                                                                                | <p>(117-120)</p>     |
| <p style="text-align: center;"><b>Glucosylceramide</b></p>                                                                                                                                                                                                                                                | <p>HIV-1 infection</p>                      | <p>Binding of human immunodeficiency virus type I (HIV-1) gp120 to galactosylceramide (GalCer)<br/>HIV-1 infection in CD4-/GalCer+</p>                                                                           | <p>(121,122)</p>     |
| <td data-bbox="1010 400 1227 515"> <p>Multidrug resistance in cancer cells</p> </td> <td data-bbox="1234 400 1937 515"> <p>↑Glucosylceramides via GCS overexpression in multiple multidrug-resistant (MDR) tumors and cancer cell lines</p> </td> <td data-bbox="1944 400 2128 515"> <p>(123,124)</p> </td>                                                                                | <p>Multidrug resistance in cancer cells</p> | <p>↑Glucosylceramides via GCS overexpression in multiple multidrug-resistant (MDR) tumors and cancer cell lines</p>                                                                                              | <p>(123,124)</p>     |
| <td data-bbox="1010 520 1227 595"> <p>Inflammation</p> </td> <td data-bbox="1234 520 1937 595"> <p>↑Glucosylceramides caused by mutations in the GBA gene (Gaucher disease)</p> </td> <td data-bbox="1944 520 2128 595"> <p>(125)</p> </td>                                                                                                                                                | <p>Inflammation</p>                         | <p>↑Glucosylceramides caused by mutations in the GBA gene (Gaucher disease)</p>                                                                                                                                  | <p>(125)</p>         |
| <td data-bbox="1010 600 1227 715"> <p>Cell adhesion</p> </td> <td data-bbox="1234 600 1937 715"> <p>↑Glucosylceramides via GCS overexpression<br/>↑Glucosylceramides in cells treated with 12-O-tetradecanoylphorbol-13-acetate</p> </td> <td data-bbox="1944 600 2128 715"> <p>(116,126,127)</p> </td>                                                                                    | <p>Cell adhesion</p>                        | <p>↑Glucosylceramides via GCS overexpression<br/>↑Glucosylceramides in cells treated with 12-O-tetradecanoylphorbol-13-acetate</p>                                                                               | <p>(116,126,127)</p> |
| <td data-bbox="1010 719 1227 799"> <p>Cell differentiation</p> </td> <td data-bbox="1234 719 1937 799"> <p>↑Glucosylceramides in cells treated with 12-O-tetradecanoylphorbol-13-acetate</p> </td> <td data-bbox="1944 719 2128 799"> <p>(128,129)</p> </td>                                                                                                                               | <p>Cell differentiation</p>                 | <p>↑Glucosylceramides in cells treated with 12-O-tetradecanoylphorbol-13-acetate</p>                                                                                                                             | <p>(128,129)</p>     |
| <td data-bbox="1010 804 1227 879"> <p>Cell proliferation</p> </td> <td data-bbox="1234 804 1937 879"> <p>↑Lactosylceramides due to upregulation of LCS activity</p> </td> <td data-bbox="1944 804 2128 879"> <p>(130-132)</p> </td>                                                                                                                                                        | <p>Cell proliferation</p>                   | <p>↑Lactosylceramides due to upregulation of LCS activity</p>                                                                                                                                                    | <p>(130-132)</p>     |
| <td data-bbox="1010 884 1227 999"> <p>Cell adhesion</p> </td> <td data-bbox="1234 884 1937 999"> <p>↑Lactosylceramides due to upregulation of LCS activity<br/>Exogenous lactosylceramide treatment</p> </td> <td data-bbox="1944 884 2128 999"> <p>(133-135)</p> </td>                                                                                                                    | <p>Cell adhesion</p>                        | <p>↑Lactosylceramides due to upregulation of LCS activity<br/>Exogenous lactosylceramide treatment</p>                                                                                                           | <p>(133-135)</p>     |
| <p style="text-align: center;"><b>Lactosylceramide</b></p>                                                                                                                                                                                                                                              | <p>Angiogenesis</p>                         | <p>↑Lactosylceramides upon vascular endothelial growth factor (VEGF) treatment<br/>Exogenous lactosylceramide</p>                                                                                                | <p>(136,137)</p>     |
| <td data-bbox="1010 1123 1227 1198"> <p>ROS generation</p> </td> <td data-bbox="1234 1123 1937 1198"> <p>Exogenous lactosylceramide</p> </td> <td data-bbox="1944 1123 2128 1198"> <p>(138,139)</p> </td>                                                                                                                                                                                  | <p>ROS generation</p>                       | <p>Exogenous lactosylceramide</p>                                                                                                                                                                                | <p>(138,139)</p>     |
| <td data-bbox="1010 1203 1227 1401"> <p>Inflammation</p> </td> <td data-bbox="1234 1203 1937 1401"> <p>Exogenous lactosylceramide<br/>↑Lactosylceramides via upregulation of LCS activity in lipopolysaccharide (LPS) and interferon-gamma (IFN-gamma) treated cells<br/>↑Lactosylceramides upon cigarette smoke</p> </td> <td data-bbox="1944 1203 2128 1401"> <p>(127,140,141)</p> </td> | <p>Inflammation</p>                         | <p>Exogenous lactosylceramide<br/>↑Lactosylceramides via upregulation of LCS activity in lipopolysaccharide (LPS) and interferon-gamma (IFN-gamma) treated cells<br/>↑Lactosylceramides upon cigarette smoke</p> | <p>(127,140,141)</p> |

1. Koybasi, S., Senkal, C. E., Sundararaj, K., Spassieva, S., Bielawski, J., Osta, W., Day, T. A., Jiang, J. C., Jazwinski, S. M., Hannun, Y. A., Obeid, L. M., and Ogretmen, B. (2004) Defects in cell growth regulation by C18:0-ceramide and longevity assurance gene 1 in human head and neck squamous cell carcinomas. *The Journal of biological chemistry* **279**, 44311-44319
2. Wooten-Blanks, L. G., Song, P., Senkal, C. E., and Ogretmen, B. (2007) Mechanisms of ceramide-mediated repression of the human telomerase reverse transcriptase promoter via deacetylation of Sp3 by histone deacetylase 1. *FASEB journal : official publication of the Federation of American Societies for Experimental Biology* **21**, 3386-3397
3. Fekry, B., Esmailniakooshkghazi, A., Krupenko, S. A., and Krupenko, N. I. (2016) Ceramide Synthase 6 Is a Novel Target of Methotrexate Mediating Its Antiproliferative Effect in a p53-Dependent Manner. *PloS one* **11**, e0146618
4. Hernandez-Corbacho, M. J., Canals, D., Adada, M. M., Liu, M., Senkal, C. E., Yi, J. K., Mao, C., Luberto, C., Hannun, Y. A., and Obeid, L. M. (2015) Tumor Necrosis Factor-alpha (TNFalpha)-induced Ceramide Generation via Ceramide Synthases Regulates Loss of Focal Adhesion Kinase (FAK) and Programmed Cell Death. *The Journal of biological chemistry* **290**, 25356-25373
5. Paschall, A. V., Zimmerman, M. A., Torres, C. M., Yang, D., Chen, M. R., Li, X., Bieberich, E., Bai, A., Bielawski, J., Bielawska, A., and Liu, K. (2014) Ceramide targets XIAP and cIAP1 to sensitize metastatic colon and breast cancer cells to apoptosis induction to suppress tumor progression. *BMC cancer* **14**, 24
6. Novgorodov, S. A., Chudakova, D. A., Wheeler, B. W., Bielawski, J., Kindy, M. S., Obeid, L. M., and Gudiz, T. I. (2011) Developmentally regulated ceramide synthase 6 increases mitochondrial Ca<sup>2+</sup> loading capacity and promotes apoptosis. *J Biol Chem* **286**, 4644-4658
7. Schiffmann, S., Ziebell, S., Sandner, J., Birod, K., Deckmann, K., Hartmann, D., Rode, S., Schmidt, H., Angioni, C., Geisslinger, G., and Grosch, S. (2010) Activation of ceramide synthase 6 by celecoxib leads to a selective induction of C16:0-ceramide. *Biochem Pharmacol* **80**, 1632-1640
8. Hartmann, D., Lucks, J., Fuchs, S., Schiffmann, S., Schreiber, Y., Ferreiros, N., Merkens, J., Marschalek, R., Geisslinger, G., and Grosch, S. (2012) Long chain ceramides and very long chain ceramides have opposite effects on human breast and colon cancer cell growth. *The international journal of biochemistry & cell biology* **44**, 620-628
9. Birbes, H., El Bawab, S., Hannun, Y. A., and Obeid, L. M. (2001) Selective hydrolysis of a mitochondrial pool of sphingomyelin induces apoptosis. *FASEB journal : official publication of the Federation of American Societies for Experimental Biology* **15**, 2669-2679
10. Birbes, H., Luberto, C., Hsu, Y. T., El Bawab, S., Hannun, Y. A., and Obeid, L. M. (2005) A mitochondrial pool of sphingomyelin is involved in TNFalpha-induced Bax translocation to mitochondria. *The Biochemical journal* **386**, 445-451
11. Hoeflerlin, L. A., Fekry, B., Ogretmen, B., Krupenko, S. A., and Krupenko, N. I. (2013) Folate stress induces apoptosis via p53-dependent de novo ceramide synthesis and up-regulation of ceramide synthase 6. *The Journal of biological chemistry* **288**, 12880-12890
12. Mullen, T. D., Hannun, Y. A., and Obeid, L. M. (2012) Ceramide synthases at the centre of sphingolipid metabolism and biology. *The Biochemical journal* **441**, 789-802

13. Osawa, Y., Uchinami, H., Bielawski, J., Schwabe, R. F., Hannun, Y. A., and Brenner, D. A. (2005) Roles for C16-ceramide and sphingosine 1-phosphate in regulating hepatocyte apoptosis in response to tumor necrosis factor- $\alpha$ . *The Journal of biological chemistry* **280**, 27879-27887
14. Kroesen, B. J., Pettus, B., Luberto, C., Busman, M., Sietsma, H., de Leij, L., and Hannun, Y. A. (2001) Induction of apoptosis through B-cell receptor cross-linking occurs via de novo generated C16-ceramide and involves mitochondria. *The Journal of biological chemistry* **276**, 13606-13614
15. Seumois, G., Fillet, M., Gillet, L., Faccinnetto, C., Desmet, C., Francois, C., Dewals, B., Oury, C., Vanderplasschen, A., Lekeux, P., and Bureau, F. (2007) De novo C16- and C24-ceramide generation contributes to spontaneous neutrophil apoptosis. *J Leukoc Biol* **81**, 1477-1486
16. Senkal, C. E., Ponnusamy, S., Bielawski, J., Hannun, Y. A., and Ogretmen, B. (2010) Antiapoptotic roles of ceramide-synthase-6-generated C16-ceramide via selective regulation of the ATF6/CHOP arm of ER-stress-response pathways. *FASEB journal : official publication of the Federation of American Societies for Experimental Biology* **24**, 296-308
17. Senkal, C. E., Ponnusamy, S., Manevich, Y., Meyers-Needham, M., Saddoughi, S. A., Mukhopadyay, A., Dent, P., Bielawski, J., and Ogretmen, B. (2011) Alteration of ceramide synthase 6/C16-ceramide induces activating transcription factor 6-mediated endoplasmic reticulum (ER) stress and apoptosis via perturbation of cellular Ca<sup>2+</sup> and ER/Golgi membrane network. *The Journal of biological chemistry* **286**, 42446-42458
18. Liu, F., Li, X., Lu, C., Bai, A., Bielawski, J., Bielawska, A., Marshall, B., Schoenlein, P. V., Lebedyeva, I. O., and Liu, K. (2016) Ceramide activates lysosomal cathepsin B and cathepsin D to attenuate autophagy and induces ER stress to suppress myeloid-derived suppressor cells. *Oncotarget* **7**, 83907-83925
19. Hu, X., Yang, D., Zimmerman, M., Liu, F., Yang, J., Kannan, S., Burchert, A., Szulc, Z., Bielawska, A., Ozato, K., Bhalla, K., and Liu, K. (2011) IRF8 regulates acid ceramidase expression to mediate apoptosis and suppresses myelogenous leukemia. *Cancer research* **71**, 2882-2891
20. Niaudet, C., Bonnaud, S., Guillonneau, M., Gouard, S., Gaugler, M. H., Dutoit, S., Ripoche, N., Dubois, N., Trichet, V., Corre, I., and Paris, F. (2017) Plasma membrane reorganization links acid sphingomyelinase/ceramide to p38 MAPK pathways in endothelial cells apoptosis. *Cellular signalling* **33**, 10-21
21. Okazaki, T., Bell, R. M., and Hannun, Y. A. (1989) Sphingomyelin turnover induced by vitamin D3 in HL-60 cells. Role in cell differentiation. *The Journal of biological chemistry* **264**, 19076-19080
22. Wakita, H., Tokura, Y., Yagi, H., Nishimura, K., Furukawa, F., and Takigawa, M. (1994) Keratinocyte differentiation is induced by cell-permeant ceramides and its proliferation is promoted by sphingosine. *Arch Dermatol Res* **286**, 350-354
23. Edmond, V., Dufour, F., Poiroux, G., Shoji, K., Malleter, M., Fouque, A., Tauzin, S., Rimokh, R., Sergent, O., Penna, A., Dupuy, A., Levade, T., Theret, N., Micheau, O., Segui, B., and Legembre, P. (2015) Downregulation of ceramide synthase-6 during epithelial-to-mesenchymal transition reduces plasma membrane fluidity and cancer cell motility. *Oncogene* **34**, 996-1005

24. Zhang, S., Zhou, J., Zhang, C., Wu, H., Wang, Y., Bian, J., Guo, J., and Wu, X. (2012) Arsenic trioxide inhibits HCCLM3 cells invasion through de novo ceramide synthesis and sphingomyelinase-induced ceramide production. *Med Oncol* **29**, 2251-2260
25. Mesicek, J., Lee, H., Feldman, T., Jiang, X., Skobeleva, A., Berdyshev, E. V., Haimovitz-Friedman, A., Fuks, Z., and Kolesnick, R. (2010) Ceramide synthases 2, 5, and 6 confer distinct roles in radiation-induced apoptosis in HeLa cells. *Cellular signalling* **22**, 1300-1307
26. Jayadev, S., Liu, B., Bielawska, A. E., Lee, J. Y., Nazaire, F., Pushkareva, M., Obeid, L. M., and Hannun, Y. A. (1995) Role for ceramide in cell cycle arrest. *The Journal of biological chemistry* **270**, 2047-2052
27. Kuroki, J., Hirokawa, M., Kitabayashi, A., Lee, M., Horiuchi, T., Kawabata, Y., and Miura, A. B. (1996) Cell-permeable ceramide inhibits the growth of B lymphoma Raji cells lacking TNF-alpha-receptors by inducing G0/G1 arrest but not apoptosis: a new model for dissecting cell-cycle arrest and apoptosis. *Leukemia* **10**, 1950-1958
28. Dbaiibo, G. S., Pushkareva, M. Y., Jayadev, S., Schwarz, J. K., Horowitz, J. M., Obeid, L. M., and Hannun, Y. A. (1995) Retinoblastoma gene product as a downstream target for a ceramide-dependent pathway of growth arrest. *Proceedings of the National Academy of Sciences of the United States of America* **92**, 1347-1351
29. Venable, M. E., Lee, J. Y., Smyth, M. J., Bielawska, A., and Obeid, L. M. (1995) Role of ceramide in cellular senescence. *The Journal of biological chemistry* **270**, 30701-30708
30. Modrak, D. E., Leon, E., Goldenberg, D. M., and Gold, D. V. (2009) Ceramide regulates gemcitabine-induced senescence and apoptosis in human pancreatic cancer cell lines. *Mol Cancer Res* **7**, 890-896
31. De Simone, C., Ferranti, P., Picariello, G., Scognamiglio, I., Dicitore, A., Addeo, F., Chianese, L., and Stiuso, P. (2011) Peptides from water buffalo cheese whey induced senescence cell death via ceramide secretion in human colon adenocarcinoma cell line. *Mol Nutr Food Res* **55**, 229-238
32. Hetz, C. A., Hunn, M., Rojas, P., Torres, V., Leyton, L., and Quest, A. F. (2002) Caspase-dependent initiation of apoptosis and necrosis by the Fas receptor in lymphoid cells: onset of necrosis is associated with delayed ceramide increase. *J Cell Sci* **115**, 4671-4683
33. Bailey, L. J., Alahari, S., Tagliaferro, A., Post, M., and Caniggia, I. (2017) Augmented trophoblast cell death in preeclampsia can proceed via ceramide-mediated necroptosis. *Cell Death Dis* **8**, e2590
34. Sawai, H., Ogiso, H., and Okazaki, T. (2015) Differential changes in sphingolipids between TNF-induced necroptosis and apoptosis in U937 cells and necroptosis-resistant sublines. *Leuk Res* **39**, 964-970
35. Ardestani, S., Deskins, D. L., and Young, P. P. (2013) Membrane TNF-alpha-activated programmed necrosis is mediated by Ceramide-induced reactive oxygen species. *J Mol Signal* **8**, 12
36. Thon, L., Mohlig, H., Mathieu, S., Lange, A., Bulanova, E., Winoto-Morbach, S., Schutze, S., Bulfone-Paus, S., and Adam, D. (2005) Ceramide mediates caspase-independent programmed cell death. *FASEB journal : official publication of the Federation of American Societies for Experimental Biology* **19**, 1945-1956
37. Scarlatti, F., Bauvy, C., Ventruti, A., Sala, G., Cluzeaud, F., Vandewalle, A., Ghidoni, R., and Codogno, P. (2004) Ceramide-mediated macroautophagy involves inhibition of protein kinase B and up-regulation of beclin 1. *J Biol Chem* **279**, 18384-18391



38. Taniguchi, M., Kitatani, K., Kondo, T., Hashimoto-Nishimura, M., Asano, S., Hayashi, A., Mitsutake, S., Igarashi, Y., Umehara, H., Takeya, H., Kigawa, J., and Okazaki, T. (2012) Regulation of autophagy and its associated cell death by "sphingolipid rheostat": reciprocal role of ceramide and sphingosine 1-phosphate in the mammalian target of rapamycin pathway. *J Biol Chem* **287**, 39898-39910
39. Patingre, S., Bauvy, C., Carpentier, S., Levade, T., Levine, B., and Codogno, P. (2009) Role of JNK1-dependent Bcl-2 phosphorylation in ceramide-induced macroautophagy. *J Biol Chem* **284**, 2719-2728
40. Spassieva, S. D., Mullen, T. D., Townsend, D. M., and Obeid, L. M. (2009) Disruption of ceramide synthesis by CerS2 down-regulation leads to autophagy and the unfolded protein response. *The Biochemical journal* **424**, 273-283
41. Deroyer, C., Renert, A. F., Merville, M. P., and Fillet, M. (2014) New role for EMD (emerin), a key inner nuclear membrane protein, as an enhancer of autophagosome formation in the C16-ceramide autophagy pathway. *Autophagy* **10**, 1229-1240
42. Sentelle, R. D., Senkal, C. E., Jiang, W., Ponnusamy, S., Gencer, S., Selvam, S. P., Ramshesh, V. K., Peterson, Y. K., Lemasters, J. J., Szulc, Z. M., Bielawski, J., and Ogretmen, B. (2012) Ceramide targets autophagosomes to mitochondria and induces lethal mitophagy. *Nat Chem Biol* **8**, 831-838
43. Canals, D., Jenkins, R. W., Roddy, P., Hernandez-Corbacho, M. J., Obeid, L. M., and Hannun, Y. A. (2010) Differential effects of ceramide and sphingosine 1-phosphate on ERM phosphorylation: probing sphingolipid signaling at the outer plasma membrane. *The Journal of biological chemistry* **285**, 32476-32485
44. Adada, M., Canals, D., Hannun, Y. A., and Obeid, L. M. (2014) Sphingolipid regulation of ezrin, radixin, and moesin proteins family: implications for cell dynamics. *Biochimica et biophysica acta* **1841**, 727-737
45. Orr Gandy, K. A., Adada, M., Canals, D., Carroll, B., Roddy, P., Hannun, Y. A., and Obeid, L. M. (2013) Epidermal growth factor-induced cellular invasion requires sphingosine-1-phosphate/sphingosine-1-phosphate 2 receptor-mediated ezrin activation. *FASEB journal : official publication of the Federation of American Societies for Experimental Biology* **27**, 3155-3166
46. Zeidan, Y. H., Jenkins, R. W., and Hannun, Y. A. (2008) Remodeling of cellular cytoskeleton by the acid sphingomyelinase/ceramide pathway. *J Cell Biol* **181**, 335-350
47. Holland, W. L., Brozinick, J. T., Wang, L. P., Hawkins, E. D., Sargent, K. M., Liu, Y., Narra, K., Hoehn, K. L., Knotts, T. A., Siesky, A., Nelson, D. H., Karathanasis, S. K., Fontenot, G. K., Birnbaum, M. J., and Summers, S. A. (2007) Inhibition of ceramide synthesis ameliorates glucocorticoid-, saturated-fat-, and obesity-induced insulin resistance. *Cell Metab* **5**, 167-179
48. Ramirez, T., Longato, L., Dostalek, M., Tong, M., Wands, J. R., and de la Monte, S. M. (2013) Insulin resistance, ceramide accumulation and endoplasmic reticulum stress in experimental chronic alcohol-induced steatohepatitis. *Alcohol Alcohol* **48**, 39-52
49. Raichur, S., Wang, S. T., Chan, P. W., Li, Y., Ching, J., Chaurasia, B., Dogra, S., Ohman, M. K., Takeda, K., Sugii, S., Pewzner-Jung, Y., Futerman, A. H., and Summers, S. A. (2014) CerS2 haploinsufficiency inhibits beta-oxidation and confers susceptibility to diet-induced steatohepatitis and insulin resistance. *Cell Metab* **20**, 687-695

50. Longato, L., Ripp, K., Setshedi, M., Dostalek, M., Akhlaghi, F., Branda, M., Wands, J. R., and de la Monte, S. M. (2012) Insulin resistance, ceramide accumulation, and endoplasmic reticulum stress in human chronic alcohol-related liver disease. *Oxid Med Cell Longev* **2012**, 479348
51. Longato, L., Tong, M., Wands, J. R., and de la Monte, S. M. (2012) High fat diet induced hepatic steatosis and insulin resistance: Role of dysregulated ceramide metabolism. *Hepatol Res* **42**, 412-427
52. Choi, S., and Snider, A. J. (2015) Sphingolipids in High Fat Diet and Obesity-Related Diseases. *Mediators Inflamm* **2015**, 520618
53. Paugh, S. W., Paugh, B. S., Rahmani, M., Kapitonov, D., Almenara, J. A., Kordula, T., Milstien, S., Adams, J. K., Zipkin, R. E., Grant, S., and Spiegel, S. (2008) A selective sphingosine kinase 1 inhibitor integrates multiple molecular therapeutic targets in human leukemia. *Blood* **112**, 1382-1391
54. French, K. J., Upson, J. J., Keller, S. N., Zhuang, Y., Yun, J. K., and Smith, C. D. (2006) Antitumor activity of sphingosine kinase inhibitors. *J Pharmacol Exp Ther* **318**, 596-603
55. Chang, C. L., Ho, M. C., Lee, P. H., Hsu, C. Y., Huang, W. P., and Lee, H. (2009) S1P(5) is required for sphingosine 1-phosphate-induced autophagy in human prostate cancer PC-3 cells. *American journal of physiology. Cell physiology* **297**, C451-458
56. Huang, Y. L., Chang, C. L., Tang, C. H., Lin, Y. C., Ju, T. K., Huang, W. P., and Lee, H. (2014) Extrinsic sphingosine 1-phosphate activates S1P5 and induces autophagy through generating endoplasmic reticulum stress in human prostate cancer PC-3 cells. *Cell Signal* **26**, 611-618
57. Moruno Manchon, J. F., Uzor, N. E., Finkbeiner, S., and Tsvetkov, A. S. (2016) SPHK1/sphingosine kinase 1-mediated autophagy differs between neurons and SH-SY5Y neuroblastoma cells. *Autophagy* **12**, 1418-1424
58. Harvald, E. B., Olsen, A. S., and Faergeman, N. J. (2015) Autophagy in the light of sphingolipid metabolism. *Apoptosis : an international journal on programmed cell death* **20**, 658-670
59. Xia, P., Gamble, J. R., Rye, K. A., Wang, L., Hii, C. S., Cockerill, P., Khew-Goodall, Y., Bert, A. G., Barter, P. J., and Vadas, M. A. (1998) Tumor necrosis factor-alpha induces adhesion molecule expression through the sphingosine kinase pathway. *Proceedings of the National Academy of Sciences of the United States of America* **95**, 14196-14201
60. Spiegel, S., and Milstien, S. (2011) The outs and the ins of sphingosine-1-phosphate in immunity. *Nat Rev Immunol* **11**, 403-415
61. Snider, A. J., Kawamori, T., Bradshaw, S. G., Orr, K. A., Gilkeson, G. S., Hannun, Y. A., and Obeid, L. M. (2009) A role for sphingosine kinase 1 in dextran sulfate sodium-induced colitis. *FASEB journal : official publication of the Federation of American Societies for Experimental Biology* **23**, 143-152
62. Liang, J., Nagahashi, M., Kim, E. Y., Harikumar, K. B., Yamada, A., Huang, W. C., Hait, N. C., Allegood, J. C., Price, M. M., Avni, D., Takabe, K., Kordula, T., Milstien, S., and Spiegel, S. (2013) Sphingosine-1-phosphate links persistent STAT3 activation, chronic intestinal inflammation, and development of colitis-associated cancer. *Cancer cell* **23**, 107-120
63. Schwab, S. R., Pereira, J. P., Matloubian, M., Xu, Y., Huang, Y., and Cyster, J. G. (2005) Lymphocyte sequestration through S1P lyase inhibition and disruption of S1P gradients. *Science* **309**, 1735-1739

64. Price, M. M., Oskeritzian, C. A., Falanga, Y. T., Harikumar, K. B., Allegood, J. C., Alvarez, S. E., Conrad, D., Ryan, J. J., Milstien, S., and Spiegel, S. (2013) A specific sphingosine kinase 1 inhibitor attenuates airway hyperresponsiveness and inflammation in a mast cell-dependent murine model of allergic asthma. *J Allergy Clin Immunol* **131**, 501-511 e501
65. Nishiuma, T., Nishimura, Y., Okada, T., Kuramoto, E., Kotani, Y., Jahangeer, S., and Nakamura, S. (2008) Inhalation of sphingosine kinase inhibitor attenuates airway inflammation in asthmatic mouse model. *Am J Physiol Lung Cell Mol Physiol* **294**, L1085-1093
66. Adada, M. M., Orr-Gandy, K. A., Snider, A. J., Canals, D., Hannun, Y. A., Obeid, L. M., and Clarke, C. J. (2013) Sphingosine kinase 1 regulates tumor necrosis factor-mediated RANTES induction through p38 mitogen-activated protein kinase but independently of nuclear factor kappaB activation. *J Biol Chem* **288**, 27667-27679
67. Adada, M. M., Canals, D., Jeong, N., Kelkar, A. D., Hernandez-Corbacho, M., Pulkoski-Gross, M. J., Donaldson, J. C., Hannun, Y. A., and Obeid, L. M. (2015) Intracellular sphingosine kinase 2-derived sphingosine-1-phosphate mediates epidermal growth factor-induced ezrin-radixin-moesin phosphorylation and cancer cell invasion. *FASEB journal : official publication of the Federation of American Societies for Experimental Biology* **29**, 4654-4669
68. Salama, M. F., Carroll, B., Adada, M., Pulkoski-Gross, M., Hannun, Y. A., and Obeid, L. M. (2015) A novel role of sphingosine kinase-1 in the invasion and angiogenesis of VHL mutant clear cell renal cell carcinoma. *FASEB journal : official publication of the Federation of American Societies for Experimental Biology* **29**, 2803-2813
69. Young, N., Pearl, D. K., and Van Brocklyn, J. R. (2009) Sphingosine-1-phosphate regulates glioblastoma cell invasiveness through the urokinase plasminogen activator system and CCN1/Cyr61. *Mol Cancer Res* **7**, 23-32
70. Li, M. H., Sanchez, T., Yamase, H., Hla, T., Oo, M. L., Pappalardo, A., Lynch, K. R., Lin, C. Y., and Ferrer, F. (2009) S1P/S1P1 signaling stimulates cell migration and invasion in Wilms tumor. *Cancer Lett* **276**, 171-179
71. Patmanathan, S. N., Johnson, S. P., Lai, S. L., Panja Bernam, S., Lopes, V., Wei, W., Ibrahim, M. H., Torta, F., Narayanaswamy, P., Wenk, M. R., Herr, D. R., Murray, P. G., Yap, L. F., and Paterson, I. C. (2016) Aberrant expression of the S1P regulating enzymes, SPHK1 and SGPL1, contributes to a migratory phenotype in OSCC mediated through S1PR2. *Sci Rep* **6**, 25650
72. Gandy, K. A., Canals, D., Adada, M., Wada, M., Roddy, P., Snider, A. J., Hannun, Y. A., and Obeid, L. M. (2013) Sphingosine 1-phosphate induces filopodia formation through S1PR2 activation of ERM proteins. *The Biochemical journal* **449**, 661-672
73. Nava, V. E., Cuvillier, O., Edsall, L. C., Kimura, K., Milstien, S., Gelmann, E. P., and Spiegel, S. (2000) Sphingosine enhances apoptosis of radiation-resistant prostate cancer cells. *Cancer research* **60**, 4468-4474
74. Pchejetski, D., Golzio, M., Bonhoure, E., Calvet, C., Doumerc, N., Garcia, V., Mazerolles, C., Rischmann, P., Teissie, J., Malavaud, B., and Cuvillier, O. (2005) Sphingosine kinase-1 as a chemotherapy sensor in prostate adenocarcinoma cell and mouse models. *Cancer Res* **65**, 11667-11675
75. Ahn, E. H., and Schroeder, J. J. (2010) Induction of apoptosis by sphingosine, sphinganine, and C(2)-ceramide in human colon cancer cells, but not by C(2)-dihydroceramide. *Anticancer Res* **30**, 2881-2884
76. Woodcock, J. (2006) Sphingosine and ceramide signalling in apoptosis. *IUBMB Life* **58**, 462-466

77. Suzuki, E., Handa, K., Toledo, M. S., and Hakomori, S. (2004) Sphingosine-dependent apoptosis: a unified concept based on multiple mechanisms operating in concert. *Proceedings of the National Academy of Sciences of the United States of America* **101**, 14788-14793
78. Cuvillier, O. (2002) Sphingosine in apoptosis signaling. *Biochimica et biophysica acta* **1585**, 153-162
79. Xu, R., Wang, K., Mileva, I., Hannun, Y. A., Obeid, L. M., and Mao, C. (2016) Alkaline ceramidase 2 and its bioactive product sphingosine are novel regulators of the DNA damage response. *Oncotarget* **7**, 18440-18457
80. Cuvillier, O., Nava, V. E., Murthy, S. K., Edsall, L. C., Levade, T., Milstien, S., and Spiegel, S. (2001) Sphingosine generation, cytochrome c release, and activation of caspase-7 in doxorubicin-induced apoptosis of MCF7 breast adenocarcinoma cells. *Cell death and differentiation* **8**, 162-171
81. Schmelz, E. M., Roberts, P. C., Kustin, E. M., Lemonnier, L. A., Sullards, M. C., Dillehay, D. L., and Merrill, A. H., Jr. (2001) Modulation of intracellular beta-catenin localization and intestinal tumorigenesis in vivo and in vitro by sphingolipids. *Cancer Res* **61**, 6723-6729
82. Sun, W., Xu, R., Hu, W., Jin, J., Crellin, H. A., Bielawski, J., Szulc, Z. M., Thiers, B. H., Obeid, L. M., and Mao, C. (2008) Upregulation of the human alkaline ceramidase 1 and acid ceramidase mediates calcium-induced differentiation of epidermal keratinocytes. *The Journal of investigative dermatology* **128**, 389-397
83. Lamour, N. F., Stahelin, R. V., Wijesinghe, D. S., Maceyka, M., Wang, E., Allegood, J. C., Merrill, A. H., Jr., Cho, W., and Chalfant, C. E. (2007) Ceramide kinase uses ceramide provided by ceramide transport protein: localization to organelles of eicosanoid synthesis. *Journal of lipid research* **48**, 1293-1304
84. Presa, N., Gomez-Larrauri, A., Rivera, I. G., Ordonez, M., Trueba, M., and Gomez-Munoz, A. (2016) Regulation of cell migration and inflammation by ceramide 1-phosphate. *Biochimica et biophysica acta* **1861**, 402-409
85. Granado, M. H., Gangoiti, P., Ouro, A., Arana, L., Gonzalez, M., Trueba, M., and Gomez-Munoz, A. (2009) Ceramide 1-phosphate (C1P) promotes cell migration Involvement of a specific C1P receptor. *Cellular signalling* **21**, 405-412
86. Kim, C., Schneider, G., Abdel-Latif, A., Mierzejewska, K., Sunkara, M., Borkowska, S., Ratajczak, J., Morris, A. J., Kucia, M., and Ratajczak, M. Z. (2013) Ceramide-1-phosphate regulates migration of multipotent stromal cells and endothelial progenitor cells--implications for tissue regeneration. *Stem Cells* **31**, 500-510
87. Gomez-Munoz, A., Duffy, P. A., Martin, A., O'Brien, L., Byun, H. S., Bittman, R., and Brindley, D. N. (1995) Short-chain ceramide-1-phosphates are novel stimulators of DNA synthesis and cell division: antagonism by cell-permeable ceramides. *Molecular pharmacology* **47**, 833-839
88. Mitra, P., Maceyka, M., Payne, S. G., Lamour, N., Milstien, S., Chalfant, C. E., and Spiegel, S. (2007) Ceramide kinase regulates growth and survival of A549 human lung adenocarcinoma cells. *FEBS letters* **581**, 735-740
89. Gomez-Munoz, A., Kong, J. Y., Salh, B., and Steinbrecher, U. P. (2004) Ceramide-1-phosphate blocks apoptosis through inhibition of acid sphingomyelinase in macrophages. *Journal of lipid research* **45**, 99-105
90. Granado, M. H., Gangoiti, P., Ouro, A., Arana, L., and Gomez-Munoz, A. (2009) Ceramide 1-phosphate inhibits serine palmitoyltransferase and blocks apoptosis in alveolar macrophages. *Biochim Biophys Acta* **1791**, 263-272

91. Gangoiti, P., Granado, M. H., Arana, L., Ouro, A., and Gomez-Munoz, A. (2008) Involvement of nitric oxide in the promotion of cell survival by ceramide 1-phosphate. *FEBS letters* **582**, 2263-2269
92. Gangoiti, P., Granado, M. H., Wang, S. W., Kong, J. Y., Steinbrecher, U. P., and Gomez-Munoz, A. (2008) Ceramide 1-phosphate stimulates macrophage proliferation through activation of the PI3-kinase/PKB, JNK and ERK1/2 pathways. *Cellular signalling* **20**, 726-736
93. Gomez-Munoz, A., Gangoiti, P., Arana, L., Ouro, A., Rivera, I. G., Ordonez, M., and Trueba, M. (2013) New insights on the role of ceramide 1-phosphate in inflammation. *Biochimica et biophysica acta* **1831**, 1060-1066
94. Gomez-Munoz, A., Gangoiti, P., Rivera, I. G., Presa, N., Gomez-Larrauri, A., and Ordonez, M. (2016) Caged ceramide 1-phosphate (C1P) analogs: Novel tools for studying C1P biology. *Chemistry and physics of lipids* **194**, 79-84
95. Hankins, J. L., Fox, T. E., Barth, B. M., Unrath, K. A., and Kester, M. (2011) Exogenous ceramide-1-phosphate reduces lipopolysaccharide (LPS)-mediated cytokine expression. *The Journal of biological chemistry* **286**, 44357-44366
96. Pettus, B. J., Bielawska, A., Spiegel, S., Roddy, P., Hannun, Y. A., and Chalfant, C. E. (2003) Ceramide kinase mediates cytokine- and calcium ionophore-induced arachidonic acid release. *The Journal of biological chemistry* **278**, 38206-38213
97. Pettus, B. J., Bielawska, A., Subramanian, P., Wijesinghe, D. S., Maceyka, M., Leslie, C. C., Evans, J. H., Freiberg, J., Roddy, P., Hannun, Y. A., and Chalfant, C. E. (2004) Ceramide 1-phosphate is a direct activator of cytosolic phospholipase A2. *The Journal of biological chemistry* **279**, 11320-11326
98. (!!! INVALID CITATION !!! {Ogretmen, 2002 #95}).
99. Gomez-Munoz, A., Presa, N., Gomez-Larrauri, A., Rivera, I. G., Trueba, M., and Ordonez, M. (2016) Control of inflammatory responses by ceramide, sphingosine 1-phosphate and ceramide 1-phosphate. *Progress in lipid research* **61**, 51-62
100. Kravka, J. M., Li, L., Szulc, Z. M., Bielawski, J., Ogretmen, B., Hannun, Y. A., Obeid, L. M., and Bielawska, A. (2007) Involvement of dihydroceramide desaturase in cell cycle progression in human neuroblastoma cells. *The Journal of biological chemistry* **282**, 16718-16728
101. Signorelli, P., Munoz-Olaya, J. M., Gagliostro, V., Casas, J., Ghidoni, R., and Fabrias, G. (2009) Dihydroceramide intracellular increase in response to resveratrol treatment mediates autophagy in gastric cancer cells. *Cancer Lett* **282**, 238-243
102. Wang, H., Maurer, B. J., Liu, Y. Y., Wang, E., Allegood, J. C., Kelly, S., Symolon, H., Liu, Y., Merrill, A. H., Jr., Gouaze-Andersson, V., Yu, J. Y., Giuliano, A. E., and Cabot, M. C. (2008) N-(4-Hydroxyphenyl)retinamide increases dihydroceramide and synergizes with dimethylsphingosine to enhance cancer cell killing. *Molecular cancer therapeutics* **7**, 2967-2976
103. Valsecchi, M., Aureli, M., Mauri, L., Illuzzi, G., Chigorno, V., Prinetti, A., and Sonnino, S. (2010) Sphingolipidomics of A2780 human ovarian carcinoma cells treated with synthetic retinoids. *Journal of lipid research* **51**, 1832-1840
104. O'Donnell, P. H., Guo, W. X., Reynolds, C. P., and Maurer, B. J. (2002) N-(4-hydroxyphenyl)retinamide increases ceramide and is cytotoxic to acute lymphoblastic leukemia cell lines, but not to non-malignant lymphocytes. *Leukemia* **16**, 902-910

105. Holliday, M. W., Jr., Cox, S. B., Kang, M. H., and Maurer, B. J. (2013) C22:0- and C24:0-dihydroceramides confer mixed cytotoxicity in T-cell acute lymphoblastic leukemia cell lines. *PLoS One* **8**, e74768
106. Venant, H., Rahmaniyan, M., Jones, E. E., Lu, P., Lilly, M. B., Garrett-Mayer, E., Drake, R. R., Kraveka, J. M., Smith, C. D., and Voelkel-Johnson, C. (2015) The Sphingosine Kinase 2 Inhibitor ABC294640 Reduces the Growth of Prostate Cancer Cells and Results in Accumulation of Dihydroceramides In Vitro and In Vivo. *Molecular cancer therapeutics* **14**, 2744-2752
107. Siddique, M. M., Li, Y., Wang, L., Ching, J., Mal, M., Ilkayeva, O., Wu, Y. J., Bay, B. H., and Summers, S. A. (2013) Ablation of dihydroceramide desaturase 1, a therapeutic target for the treatment of metabolic diseases, simultaneously stimulates anabolic and catabolic signaling. *Mol Cell Biol* **33**, 2353-2369
108. Devlin, C. M., Lahm, T., Hubbard, W. C., Van Demark, M., Wang, K. C., Wu, X., Bielawska, A., Obeid, L. M., Ivan, M., and Petrache, I. (2011) Dihydroceramide-based response to hypoxia. *J Biol Chem* **286**, 38069-38078
109. Fabrias, G., Munoz-Olaya, J., Cingolani, F., Signorelli, P., Casas, J., Gagliostro, V., and Ghidoni, R. (2012) Dihydroceramide desaturase and dihydrosphingolipids: debutant players in the sphingolipid arena. *Prog Lipid Res* **51**, 82-94
110. Gagliostro, V., Casas, J., Caretti, A., Abad, J. L., Tagliavacca, L., Ghidoni, R., Fabrias, G., and Signorelli, P. (2012) Dihydroceramide delays cell cycle G1/S transition via activation of ER stress and induction of autophagy. *Int J Biochem Cell Biol* **44**, 2135-2143
111. Noack, J., Choi, J., Richter, K., Kopp-Schneider, A., and Regnier-Vigouroux, A. (2014) A sphingosine kinase inhibitor combined with temozolomide induces glioblastoma cell death through accumulation of dihydrosphingosine and dihydroceramide, endoplasmic reticulum stress and autophagy. *Cell Death Dis* **5**, e1425
112. Hanada, K., Nishijima, M., Kiso, M., Hasegawa, A., Fujita, S., Ogawa, T., and Akamatsu, Y. (1992) Sphingolipids are essential for the growth of Chinese hamster ovary cells. Restoration of the growth of a mutant defective in sphingoid base biosynthesis by exogenous sphingolipids. *The Journal of biological chemistry* **267**, 23527-23533
113. Yamaoka, S., Miyaji, M., Kitano, T., Umehara, H., and Okazaki, T. (2004) Expression cloning of a human cDNA restoring sphingomyelin synthesis and cell growth in sphingomyelin synthase-defective lymphoid cells. *The Journal of biological chemistry* **279**, 18688-18693
114. Tafesse, F. G., Huitema, K., Hermansson, M., van der Poel, S., van den Dikkenberg, J., Uphoff, A., Somerharju, P., and Holthuis, J. C. (2007) Both sphingomyelin synthases SMS1 and SMS2 are required for sphingomyelin homeostasis and growth in human HeLa cells. *The Journal of biological chemistry* **282**, 17537-17547
115. Dressler, K. A., Kan, C. C., and Kolesnick, R. N. (1991) Sphingomyelin synthesis is involved in adherence during macrophage differentiation of HL-60 cells. *J Biol Chem* **266**, 11522-11527
116. Hidari, K., Ichikawa, S., Fujita, T., Sakiyama, H., and Hirabayashi, Y. (1996) Complete removal of sphingolipids from the plasma membrane disrupts cell to substratum adhesion of mouse melanoma cells. *J Biol Chem* **271**, 14636-14641
117. Weinstock, N. I., Wrabetz, L., Feltri, M. L., and Shin, D. (2016) Metabolic profiling reveals biochemical pathways and potential biomarkers associated with the pathogenesis of Krabbe disease. *J Neurosci Res* **94**, 1094-1107

118. Hung, J. T., Huang, J. R., and Yu, A. L. (2017) Tailored design of NKT-stimulatory glycolipids for polarization of immune responses. *J Biomed Sci* **24**, 22
119. Engstler, A. J., Sellmann, C., Jin, C. J., Brandt, A., Herz, K., Prieb, J., and Bergheim, I. (2017) Treatment with alpha-galactosylceramide protects mice from early onset of nonalcoholic steatohepatitis: Role of intestinal barrier function. *Mol Nutr Food Res*
120. McDermott, A. J., and Huffnagle, G. B. (2014) The microbiome and regulation of mucosal immunity. *Immunology* **142**, 24-31
121. Cook, D. G., Fantini, J., Spitalnik, S. L., and Gonzalez-Scarano, F. (1994) Binding of human immunodeficiency virus type I (HIV-1) gp120 to galactosylceramide (GalCer): relationship to the V3 loop. *Virology* **201**, 206-214
122. Delezay, O., Hammache, D., Fantini, J., and Yahi, N. (1996) SPC3, a V3 loop-derived synthetic peptide inhibitor of HIV-1 infection, binds to cell surface glycosphingolipids. *Biochemistry* **35**, 15663-15671
123. Lavie, Y., Cao, H., Bursten, S. L., Giuliano, A. E., and Cabot, M. C. (1996) Accumulation of glucosylceramides in multidrug-resistant cancer cells. *The Journal of biological chemistry* **271**, 19530-19536
124. Liu, Y. Y., Hill, R. A., and Li, Y. T. (2013) Ceramide glycosylation catalyzed by glucosylceramide synthase and cancer drug resistance. *Advances in cancer research* **117**, 59-89
125. Astudillo, L., Therville, N., Colacios, C., Segui, B., Andrieu-Abadie, N., and Levade, T. (2016) Glucosylceramidases and malignancies in mammals. *Biochimie* **125**, 267-280
126. Kan, C. C., and Kolesnick, R. N. (1992) A synthetic ceramide analog, D-threo-1-phenyl-2-decanoylamino-3-morpholino-1-propanol, selectively inhibits adherence during macrophage differentiation of human leukemia cells. *J Biol Chem* **267**, 9663-9667
127. Edsfeldt, A., Duner, P., Stahlman, M., Mollet, I. G., Ascitto, G., Grufman, H., Nitulescu, M., Persson, A. F., Fisher, R. M., Melander, O., Orho-Melander, M., Boren, J., Nilsson, J., and Goncalves, I. (2016) Sphingolipids Contribute to Human Atherosclerotic Plaque Inflammation. *Arterioscler Thromb Vasc Biol* **36**, 1132-1140
128. Nojiri, H., Takaku, F., Tetsuka, T., Motoyoshi, K., Miura, Y., and Saito, M. (1984) Characteristic expression of glycosphingolipid profiles in the bipotential cell differentiation of human promyelocytic leukemia cell line HL-60. *Blood* **64**, 534-541
129. Aida, J., Higuchi, S., Hasegawa, Y., Nagano-Ito, M., Hirabayashi, Y., Banba, A., Shimizu, T., Kikuchi, A., Saga, M., and Ichikawa, S. (2011) Up-regulation of ceramide glucosyltransferase during the differentiation of U937 cells. *Journal of biochemistry* **150**, 303-310
130. Chatterjee, S., Shi, W. Y., Wilson, P., and Mazumdar, A. (1996) Role of lactosylceramide and MAP kinase in the proliferation of proximal tubular cells in human polycystic kidney disease. *Journal of lipid research* **37**, 1334-1344
131. Kolmakova, A., and Chatterjee, S. (2005) Platelet derived growth factor recruits lactosylceramide to induce cell proliferation in UDP Gal:GlcCer: beta1 --> 4Galactosyltransferase (GalT-V) mutant Chinese hamster ovary cells. *Glycoconjugate journal* **22**, 401-407
132. Pannu, R., Singh, A. K., and Singh, I. (2005) A novel role of lactosylceramide in the regulation of tumor necrosis factor alpha-mediated proliferation of rat primary astrocytes. Implications for astrogliosis following neurotrauma. *The Journal of biological chemistry* **280**, 13742-13751

133. Bhunia, A. K., Arai, T., Bulkley, G., and Chatterjee, S. (1998) Lactosylceramide mediates tumor necrosis factor-alpha-induced intercellular adhesion molecule-1 (ICAM-1) expression and the adhesion of neutrophil in human umbilical vein endothelial cells. *The Journal of biological chemistry* **273**, 34349-34357
134. Gong, N., Wei, H., Chowdhury, S. H., and Chatterjee, S. (2004) Lactosylceramide recruits PKCalpha/epsilon and phospholipase A2 to stimulate PECAM-1 expression in human monocytes and adhesion to endothelial cells. *Proceedings of the National Academy of Sciences of the United States of America* **101**, 6490-6495
135. Balagopalakrishna, C., Bhunia, A. K., Rifkind, J. M., and Chatterjee, S. (1997) Minimally modified low density lipoproteins induce aortic smooth muscle cell proliferation via the activation of mitogen activated protein kinase. *Molecular and cellular biochemistry* **170**, 85-89
136. Rajesh, M., Kolmakova, A., and Chatterjee, S. (2005) Novel role of lactosylceramide in vascular endothelial growth factor-mediated angiogenesis in human endothelial cells. *Circ Res* **97**, 796-804
137. Kolmakova, A., Rajesh, M., Zang, D., Pili, R., and Chatterjee, S. (2009) VEGF recruits lactosylceramide to induce endothelial cell adhesion molecule expression and angiogenesis in vitro and in vivo. *Glycoconj J* **26**, 547-558
138. Mishra, S., Bedja, D., Amuzie, C., Avolio, A., and Chatterjee, S. (2015) Prevention of cardiac hypertrophy by the use of a glycosphingolipid synthesis inhibitor in ApoE<sup>-/-</sup> mice. *Biochemical and biophysical research communications* **465**, 159-164
139. Bhunia, A. K., Han, H., Snowden, A., and Chatterjee, S. (1997) Redox-regulated signaling by lactosylceramide in the proliferation of human aortic smooth muscle cells. *J Biol Chem* **272**, 15642-15649
140. Pannu, R., Won, J. S., Khan, M., Singh, A. K., and Singh, I. (2004) A novel role of lactosylceramide in the regulation of lipopolysaccharide/interferon-gamma-mediated inducible nitric oxide synthase gene expression: implications for neuroinflammatory diseases. *J Neurosci* **24**, 5942-5954
141. Bodas, M., Min, T., and Vij, N. (2015) Lactosylceramide-accumulation in lipid-rafts mediate aberrant-autophagy, inflammation and apoptosis in cigarette smoke induced emphysema. *Apoptosis : an international journal on programmed cell death* **20**, 725-739
